1 **Deciphering the impact of human M1AP in ZZS-mediated meiotic recombination and**  
2 **male infertility**

3 Nadja Rotte<sup>1</sup>, Jessica E.M. Dunleavy<sup>2</sup>, Michelle D. Runkel<sup>1</sup>, Daniela Fietz<sup>3</sup>, Adrian Pilatz<sup>4</sup>,  
4 Johanna Kuss<sup>1</sup>, Ann-Kristin Dicke<sup>1</sup>, Sofia B. Winge<sup>7</sup>, Sara Di Persio<sup>5</sup>, Christian Ruckert<sup>6</sup>,  
5 Verena Nordhoff<sup>5</sup>, Hans-Christian Schuppe<sup>4</sup>, Kristian Almstrup<sup>7,8</sup>, Sabine Kliesch<sup>5</sup>, Nina  
6 Neuhaus<sup>5</sup>, Birgit Stallmeyer<sup>1</sup>, Moira K. O'Bryan<sup>2</sup>, Frank Tüttelmann<sup>1</sup>, Corinna Friedrich<sup>1\*</sup>

7 <sup>1</sup>Institute of Reproductive Genetics, University of Münster, 48149 Münster, Germany

8 <sup>2</sup>School of BioSciences and Bio21 Molecular Sciences and Biotechnology Institute, Faculty of  
9 Science, University of Melbourne, Parkville, 3010 Australia

10 <sup>3</sup>Institute of Veterinary Anatomy, Histology and Embryology, University of Gießen, 35392  
11 Gießen, Germany

12 <sup>4</sup>Clinic and Polyclinic for Urology, Paediatric Urology and Andrology, University Hospital  
13 Gießen, 35392 Gießen, Germany

14 <sup>5</sup>Centre of Reproductive Medicine and Andrology, University of Münster, 48149 Münster,  
15 Germany

16 <sup>6</sup>Department of Medical Genetics, University Hospital Münster, 48149 Münster, Germany

17 <sup>7</sup>Department of Growth and Reproduction, University Hospital Copenhagen, 2100  
18 Copenhagen, Denmark

19 <sup>8</sup>Department of Cellular and Molecular Medicine, Faculty of Health and Medical Sciences,  
20 University of Copenhagen, Denmark

21 **\*Correspondence:** Institute of Reproductive Genetics, University of Münster, Vesaliusweg  
22 12-14, 48149 Münster, Germany, [corinna.friedrich@ukmuenster.de](mailto:corinna.friedrich@ukmuenster.de)

23 **Word count:** 5174 (text), 245 (abstract)

## M1AP & meiotic recombination

---

### 24 **Abstract**

25 Male infertility and meiotic arrest have been linked to *M1AP*, the gene encoding meiosis I  
26 associated protein. In mice, M1AP interacts with the ZZS proteins SHOC1, TEX11, and  
27 SPO16, which promote DNA crossover formation during meiosis. To determine whether  
28 M1AP and ZZS proteins are involved in human male infertility by disrupting crossover  
29 formation, we screened for biallelic or hemizygous loss-of-function (LoF) variants in the  
30 encoding human genes to select men with a presumed protein deficiency; we compiled N=10  
31 men for *M1AP*, N=4 for *SHOC1*, N=9 for *TEX11*, and the first homozygous LoF variant in  
32 *SPO16* in an infertile man. After in-depth characterisation of the testicular phenotype of these  
33 men, we identified gene-specific meiotic impairments: men with SHOC1, TEX11, or SPO16  
34 deficiency shared an early meiotic arrest lacking haploid germ cells. All men with LoF  
35 variants in *M1AP* exhibited a predominant metaphase I arrest with rare haploid round  
36 spermatids, and six men even produced sporadic elongated spermatids. These differences  
37 were explained by different recombination failures: abrogated SHOC1, TEX11, or SPO16 led  
38 to incorrect synapsis of homologous chromosomes and unrepaired DNA double-strand  
39 breaks (DSB). On the contrary, abolished M1AP did not affect synapsis and DSB repair but  
40 led to a reduced number of crossover events. Notably, medically assisted reproduction  
41 resulted in the birth of a healthy child, offering the possibility of fatherhood to men with LoF  
42 variants in *M1AP*. Our study establishes M1AP as an important, but not essential, catalyser  
43 in the network of ZZS-mediated meiotic recombination.

44

45 **Keywords: M1AP / meiosis / crossover / infertility / recombination**

46 **Introduction**

47 Worldwide, around one in six adults is infertile (World Health Organization, 2023), and the  
48 underlying causes are equally distributed between both sexes (Vander Borgh and Wyns,  
49 2018). In men, the most severe forms of infertility are non-obstructive azoospermia (NOA)  
50 and cryptozoospermia, meaning that due to spermatogenic failure, no or only few  
51 spermatozoa are detected in the ejaculate (Nieschlag et al., 2023). For most of these cases,  
52 the only chance of fathering a child is through testicular sperm extraction (TESE) with  
53 subsequent medically assisted reproduction (MAR) using intracytoplasmic sperm injection  
54 (ICSI).

55 In many of these men, the absence of spermatozoa is caused by an arrest of  
56 spermatogenesis at meiosis (termed meiotic arrest or spermatocyte arrest; Wyrwoll et al.,  
57 2023b). It has been repeatedly described that this phenotype often arises via monogenic  
58 traits (Krausz et al., 2020; Wyrwoll et al., 2023a). One established disease gene for meiotic  
59 arrest is *M1AP*, which encodes meiosis 1 associated protein (Wyrwoll et al., 2020). In mice,  
60 M1AP has recently been shown to interact with three well-characterised meiosis-related  
61 proteins: SHOC1, TEX11, and SPO16 (Li et al., 2023). These form a highly conserved  
62 complex, called ZZS (from yeast Zip2/Zip4/Spo16), that in many species is crucial during  
63 prophase I of meiosis (De Muyt et al., 2018). However, it remains unknown whether the  
64 same applies for human ZZS and M1AP.

65 Meiosis is the crucial process during spermatogenesis that leads to the formation of haploid  
66 germ cells. A key step during meiosis is homologous recombination, which is required for  
67 accurate chromosome segregation and the formation of haploid gametes (Jones, 1984).  
68 Homologous recombination, which also enables genetic diversity, occurs via crossovers  
69 between homologous chromosomes (chiasmata). Briefly, the process is initiated by  
70 programmed DNA double-strand breaks (DSB) in early prophase I (Figure 1A; Sun et al.,  
71 1989). At the end of this phase, the DSBs are repaired and resolved as either non-  
72 crossovers or crossovers (Baker et al., 1996). When at least one crossover per homologous

## M1AP & meiotic recombination

---

73 chromosome is formed, correct segregation can ensue; this is the *obligatory crossover*  
74 principle (Jones, 1984).

75 In humans, there are approximately 50 crossovers per spermatocyte, which translates to one  
76 to five crossovers per pair of homologous chromosomes (Sun et al., 2005). During meiosis,  
77 meiotic recombination is mediated by a subset of highly conserved proteins of the ZMM  
78 family (an acronym for the yeast proteins Zip1/Zip2/Zip3/Zip4, Msh4/Msh5, Mer3, and Spo16;  
79 reviewed in Pyatnitskaya et al., 2019), including ZZS proteins. In particular, ZZS proteins  
80 assemble within a meiosis-specific structure, the synaptonemal complex (SC), that supports  
81 the synapsis of homologous chromosomes and stabilises recombination intermediates  
82 (reviewed in Zickler and Kleckner, 2015). Only when the intermediates are stabilised by SCs,  
83 the DSBs can be resolved as class I crossovers (Börner et al., 2004).

84 Even minor errors in this tightly coordinated interplay can lead to meiotic arrest and infertility  
85 (Xie et al., 2022). Accordingly, genetic variants in each of the ZZS genes have already been  
86 linked to meiotic arrest in humans, with the typical phenotypes being NOA in men and  
87 primary/premature ovarian insufficiency (POI) in women. The ZZS gene *TEX11* is a well-  
88 established X-linked gene for clinical diagnostics in male infertility (Wyrwoll et al., 2023a;  
89 Yatsenko et al., 2015); biallelic pathogenic variants in *SHOC1* lead to infertility in men and  
90 women (Krausz et al., 2020; Ke et al., 2023); and one homozygous splice region variant in  
91 *SPO16* has recently been associated with POI (Qi et al., 2023). While a strong association  
92 between *M1AP* and male infertility has been demonstrated (Wyrwoll et al., 2020; Li et al.,  
93 2023), the protein's molecular function remains unexplored in humans.

94 In this study, we established how human M1AP interacts *in vitro* with each of the ZZS  
95 proteins. Additionally, we present the first man homozygous for a loss-of-function (LoF)  
96 variant in *SPO16*. The testicular phenotype of this man and men with LoF variants in the  
97 other ZZS genes *SHOC1* and *TEX11* shared an early prophase I arrest including asynapsis  
98 and unrepaired DSBs. In contrast, LoF variants in *M1AP* led to a metaphase I arrest, where  
99 early meiotic recombination was completed while the total number of the final recombination

## M1AP & meiotic recombination

---

100 products, the meiotic crossover events, was reduced. Ultimately, this leads to a predominant  
101 meiotic arrest, but fertilisation-competent spermatozoa have on rare occasions been  
102 retrieved by testicular sperm extraction. This demonstrates that M1AP is an important but not  
103 essential catalyser in the complex network of meiotic recombination. Collectively, these  
104 genotype-specific differences have important clinical implications, as they can be used to  
105 guide evidence-based treatment decisions or counselling of couples with male-factor  
106 infertility.

107

108 **Results**

109 **Human M1AP interacts with the ZZS proteins SHOC1, TEX11, and SPO16 *in vitro* and**  
110 **shares a similar mRNA expression profile**

111 To assess interaction between the ZZS proteins and M1AP in humans, we performed co-  
112 immunoprecipitation (IP). Human DYK-tagged M1AP was co-expressed with human HA-  
113 tagged SHOC1, TEX11, or SPO16 in HEK293T cells. Proteins were immunoprecipitated  
114 from cell lysates by tag-specific antibodies. A subsequent Western blot showed that human  
115 M1AP binds specifically to each of the three ZZS complex components (Figure 1B), showing  
116 that M1AP interacts with the ZZS complex in humans. Assuming a closely related function of  
117 all four proteins in human meiosis, we aimed to investigate whether all four genes share a  
118 similar testicular expression profile. Thus, previously published single-cell RNA sequencing  
119 data of human testicular tissue (Di Persio et al., 2021) were queried (Figure 1C). Overall, the  
120 analysis showed that all four genes are similarly expressed in all stages of meiosis with  
121 strong mRNA abundance during early prophase I (leptotene, zygotene). *SHOC1* and *TEX11*  
122 showed an additional increase of expression during later meiotic divisions.

123 **Composition of the study cohort with men carrying LoF variants in *M1AP* or ZZS**

124 To compare the protein-related impact of each of the four proteins on human meiosis, we  
125 selected cases carrying LoF variants in either *M1AP* (NM\_138804.4) or one of the ZZS  
126 components encoding genes, *SHOC1* (NM\_173521.5), *TEX11* (NM\_001003811.2), and  
127 *SPO16* (NM\_001012425.2) from our Male Reproductive Genomics (MERGE) study cohort.  
128 In addition, we included one published case with a variant in *SHOC1* from the GEMINI cohort  
129 (Nagirnaja et al., 2022; G-377). Both previously published (N=10) and novel (N=14) cases  
130 were considered for functional in-depth analysis.

131 We compared the phenotypes of ten unrelated men with homozygous LoF variants in *M1AP*,  
132 four with biallelic LoF variants in *SHOC1*, nine with hemizygous LoF variants in *TEX11*, and  
133 one man with a homozygous LoF variant in *SPO16* (Figure 1D, Table 1). Nine of the men  
134 with a LoF variant in *M1AP* carried the recurrent pathogenic frameshift variant c.676dup, of

## M1AP & meiotic recombination

---

135 which four had already been published (Wyrwoll et al., 2020) while one man (M3609) carried  
136 a homozygous *M1AP* splice site variant (c.1073\_1074+10del). This variant was predicted to  
137 undergo nonsense-mediated decay. The functional significance was analysed *in vitro* by a  
138 minigene assay which demonstrated aberrant splicing (Appendix Figure S1).

139 For *SHOC1*, we selected two men (M2012, G-377) carrying the same homozygous  
140 frameshift variant (c.1085\_1086del) and one case (M2046) with confirmed compound  
141 heterozygous variants (c.[1351del;1347T>A];[945\_948del]), who were previously described  
142 (Table 1; Krausz et al., 2020; Nagirnaja et al., 2022). In addition, a novel splice site variant  
143 (c.1939+2T>C) was identified in one man (M3260). The *in vitro* minigene assay showed  
144 aberrant splicing likely resulting in an in-frame exon skipping event involving only ~4% of the  
145 total protein (Appendix Figure S2). This affects the distant helicase hits region but not the  
146 highly conserved 'SHOC1 homology region' (Macaisne et al., 2008).

147 The cohort of nine men with hemizygous LoF variants in *TEX11* comprised three men with  
148 different partial gene deletions, of which two were inherited from the mother (Appendix  
149 Figures S17/S18), two men with splice site variants, and four men with variants encoding  
150 premature stop codons (Table 1); three of these cases have already been described but not  
151 in this detail (Wyrwoll et al., 2023a; Yatsenko et al., 2015).

152 One man (M3863) carried a novel homozygous frameshift variant (c.266del  
153 p.(Leu89Trpfs\*15)) in the highly conserved ZZS gene *SPO16* (Table 1). This variant was  
154 predicted to induce a premature stop codon in exon 4 and to truncate >40% of the complete  
155 protein. Most of the protein's central domain and the entire functional helix-hairpin-helix  
156 (HhH) domain would be affected by the truncation (Appendix Figure S3). According to the  
157 prediction, it was more likely that the mRNA was degraded by nonsense-mediated decay. In  
158 both cases, a loss of protein function can be expected.

159 Semen analysis of all 24 men included in this study revealed a high proportion of  
160 azoospermia (N=21), with the remaining three men displaying cryptozoospermia.

## M1AP & meiotic recombination

---

161 Interestingly, all three cryptozoospermic men were homozygous for the recurrent LoF variant  
162 in *M1AP* (c.676dup). Clinical features were similar between men, including normal testicular  
163 volumes, normal luteinising hormone, follicle-stimulating hormone in the high range, and  
164 normal testosterone (Appendix Table S1; Appendix Figure S4).

### 165 **Men with LoF variants in *M1AP* or *ZZS* showed gene-specific spermatogenic defects**

166 Testicular biopsies originating from testicular sperm retrieval (TESE) procedures were  
167 available in 21 of the selected cases and used for histological evaluation of spermatogenic  
168 differentiation. Analysis using periodic acid-Schiff (PAS, N=14) or haematoxylin and eosin  
169 (H&E, N=6) staining determined a common testicular phenotype of predominant  
170 spermatocyte arrest in all cases (Human Phenotype Ontology [HPO] term: HP:0031039,  
171 Figure 2A; Appendix Figure S5/S6). In addition, we observed cells in diakinesis or  
172 metaphase I stage characterised by scattered and misaligned chromosomes (Figure 2A,  
173 detail view). Of note, we only saw metaphase cells with correctly aligned chromosomes in  
174 controls and in men with LoF variants in *M1AP*.

175 To analyse the presence of post-meiotic germ cells, we performed immunohistochemical  
176 staining for cAMP responsive element modulator (CREM), a marker protein for round  
177 spermatids (Weinbauer et al., 1998). Tissue of 16 men was available for subsequent analysis  
178 (Figure 2B, Appendix Figure S7). In fertile control samples (N=3), CREM positive spermatids  
179 were observed in almost all tubules with an average  $30.42 \pm 1.20$  spermatids per tubule. In  
180 all men analysed with LoF variants in *M1AP* (N=7), CREM-positive spermatids were  
181 observed however in significantly lower numbers than controls with an average of  $0.50 \pm$   
182  $0.16$  cell/tubule. Indeed, some but not all seminiferous tubules were found to contain round  
183 spermatids, and elongated spermatids were only observed in six of these cases. In contrast,  
184 CREM-positive round spermatids were only observed in one man with a splice site variant in  
185 *SHOC1* (M3260), and here we detected much fewer of this germ cell subtype than in cases  
186 with LoF variants in *M1AP*. In addition, we detected no CREM-positive round spermatids in  
187 cases with LoF variants in *SHOC1* or *TEX11*. The single case with a homozygous LoF in



## M1AP & meiotic recombination

---

188 *SPO16* (M3863) exhibited complete meiotic arrest without CREM-positive round spermatids  
189 (Figure 2C). These results demonstrate a different testicular phenotype between men with  
190 LoF variants in *M1AP* and men affected by LoF variants in key components of the ZZS  
191 complex.

### 192 **Proper chromosome synapsis and XY body formation despite M1AP deficiency**

193 To assess whether the LoF variants in *M1AP* and in ZZS genes led to the impaired  
194 production of post-meiotic cells because of alterations in meiotic recombination, we stained  
195 patients' testicular tissue for the two key meiosis markers  $\gamma$ H2AX and H3S10p.  
196 Phosphorylated histone variant H2AX ( $\gamma$ H2AX) is a marker for DSBs and was used to  
197 analyse DSB repair and correct synapsis of homologous chromosomes. In autosomes, DSBs  
198 are repaired once the homologues have successfully aligned and synapsed, and,  
199 consequently,  $\gamma$ H2AX staining disappears. In parallel, when meiotic sex chromosome  
200 inactivation (MSCI) takes place during pachytene, a condensed chromatin domain is formed,  
201 termed the XY body. Here,  $\gamma$ H2AX accumulates independent of meiotic recombination-  
202 associated DSBs (Fernandez-Capetillo et al., 2003). Together, the DSB repair in autosomes  
203 and the distinct formation of the XY body suggest that cells are passing through the  
204 pachytene checkpoint (Hamer et al., 2003).

205 Figure 3A shows the distinct  $\gamma$ H2AX localisation during meiosis I prophase and metaphase in  
206 a human control. Men with LoF variants in *M1AP* were characterised by a qualitatively  
207 equivalent staining pattern, with quantitatively reduced amounts of pachytene and increased  
208 amounts of zygotene cells (Figure 3A, detail view, bar graph, Appendix Figure S8).  
209 Interestingly, the complete repair of DSBs post-zygotene and the clear restriction of  $\gamma$ H2AX  
210 to the XY body was only observed in controls and in men with LoF variants in *M1AP*. In men  
211 with LoF variants in *SHOC1*, *TEX11*, or *SPO16*, most of the cells maintained a zygotene-to-  
212 pachytene-like stage with enlarged nuclei, accumulated DSBs, and aberrant  $\gamma$ H2AX  
213 localisation (Figure 3A, detail view, bar graph, Appendix Figure S9). Thus, an arrest in these  
214 men occurs between zygotene to early pachytene, referring to a human type I meiotic (Jan et

## M1AP & meiotic recombination

---

215 al., 2018) or pachytene arrest (Enguita-Marruedo et al., 2019). Remarkably, even though  
216 cells do not proceed properly beyond zygotene-pachytene in the majority of men with LoF  
217 variants in *SHOC1*, *TEX11*, or *SPO16*,  $\gamma$ H2AX-positive metaphase-like or diakinesis cells (M-  
218 I\*) were seen in most of the cases (N=8). These cells were characterised by scattered  
219 chromosomes, incorrectly aligned at the metaphase plate or maintained in a diakinesis  
220 stage. While similar cells were seen in men with LoF variants in *M1AP*, we also observed in  
221 parallel  $\gamma$ H2AX-negative, intact metaphase cells with properly aligned chromosomes (N=7).

222 In addition, we used phosphorylated histone 3 (H3S10p) to mark cells reaching the  
223 metaphase stage (Song et al., 2011). H3 is phosphorylated when the DNA is condensed  
224 during mitosis and meiosis for subsequent segregation of the chromosomes. Localisation of  
225 H3S10p in all cases with LoF variants in *M1AP* showed that the cells with properly aligned  
226 chromosomes are meiotic metaphase cells (Appendix Figure S10). This, together with the  
227 presence of post-meiotic cells, classified the arrest in men with *M1AP* LoF variants as a  
228 partial metaphase I arrest (Enguita-Marruedo et al., 2019). In accordance with the  $\gamma$ H2AX  
229 staining, localisation of H3S10p in men with LoF variants in *SHOC1*, *TEX11*, or *SPO16*  
230 revealed only aberrant metaphase-like/diakinesis-stage (M-I\*) or mitotic cells  
231 (Appendix Figure S10).

### 232 **Increased apoptosis leads to a loss of germ cells**

233 Maintenance of  $\gamma$ H2AX localisation in metaphase I cells indicates a failure of meiotic  
234 recombination and checkpoint-induced apoptotic events (Enguita-Marruedo et al., 2019).  
235 Thus, we quantified apoptotic DNA fragmentation via TUNEL assay. Compared to controls,  
236 we observed a significant increase in apoptosis for all patients analysed (Figure 3B,  
237 Appendix Figure S11). Most TUNEL-positive cells showed hallmarks of apoptosis, namely  
238 condensation, fragmentation, and apoptotic bodies (Saraste and Pulkki, 2000). In addition,  
239 aberrant metaphase I cells with misaligned chromosomes or diakinesis-stage cells (M-I\*)  
240 were also TUNEL-positive (Figure 3B, detail view). In cases with LoF variants in *SHOC1*,  
241 *TEX11*, and *SPO16*, apoptotic DNA fragmentation was also found in rare pre-metaphase

## M1AP & meiotic recombination

---

242 spermatocytes. One key difference between the cases was that only men with LoF variants  
243 in *M1AP* exhibited TUNEL-negative metaphase cells, round, and even elongated spermatids.

### 244 **Sufficient crossover events occurred despite *M1AP* LoF variants**

245 To address whether meiotic recombination was successfully completed in spermatocytes  
246 from men with LoF variants in *M1AP*, allowing them to differentiate into post-meiotic haploid  
247 cells, we analysed spermatocyte spreads of one man (M864). In comparison, we determined  
248 the recombination failure in one man each with a LoF variant in *SHOC1* (M2046), *TEX11*  
249 (M3409), or *SPO16* (M3863). To indicate whether the synaptonemal complex (SC) formed  
250 properly, we stained for SYCP1 and SYCP3-containing elements of the SC that assemble  
251 along unaligned chromosome axes (Yuan et al., 2000). For crossover formation to occur,  
252 homologous chromosomes must undergo full synapsis, which is fulfilled when the transverse  
253 filament protein of the SC, SYCP1, localises between the axes (Dunce et al., 2018). To  
254 visualise designated crossover sites, we stained for MLH1, an endonuclease involved in the  
255 resolution of crossovers (Baker et al., 1996). To quantify meiotic recombination, we counted  
256 MLH1 foci in pachytene cells (n=10). In addition, to determine the progression of prophase I,  
257 we stained for  $\gamma$ H2AX. Further, to analyse the correct recruitment of the ZZS complex, we  
258 labelled *TEX11*. For a better orientation, we marked the centromeres using a human anti-  
259 centromere antibody (ACA) (Figure 4A/B cyan, Appendix Figure S12/S13 cyan).

260 Similar to the control, we observed spermatocytes of M864 (LoF variant in *M1AP*) in the  
261 pachytene stage, including properly formed chromosome axes (SYCP3) and fully synapsed  
262 homologues (SYCP1). In addition, crossovers were indicated by MLH1 foci (Figure 4A). In  
263 contrast, in men with *SHOC1*, *TEX11*, or *SPO16* deficiency, no pachytene spermatocytes  
264 were identified (Figure 4B, Appendix Figure S12/S13). In all three cases, accumulated  
265  $\gamma$ H2AX domains were observed (Appendix Figure S13 red). In addition, SYCP1 assembly  
266 was highly reduced in M2046 (*SHOC1*) and facilitated to some extent in M3409 (*TEX11*) and  
267 M3863 (*SPO16*; Figure 4B red, Appendix Figure S12 red). Moreover, *TEX11* was completely  
268 absent in M3409 (*TEX11*) and highly reduced and disorganised in M2046 (*SHOC1*) and

## M1AP & meiotic recombination

---

269 M3863 (SPO16; Appendix Figure S13 magenta). In contrast, in M864 (M1AP),  
270 spermatocytes reached the pachytene stage, had resolved DSBs ( $\gamma$ H2AX), and showed  
271 reduced but successful TEX11 recruitment to the chromosome axes (Appendix Figure S13  
272 red). Importantly though, the man with a LoF variant in *M1AP* showed fewer designated  
273 crossover sites per spermatocyte (via quantification of MLH1 foci) than the control (Figure 4B  
274 magenta). Specifically, the man had on average  $34.5 \pm 2$  MLH1 foci per spermatocyte vs.  
275  $48 \pm 2$  foci per control spermatocyte.

276 One crucial principle of meiotic recombination is the acquired number of crossovers per pair  
277 of homologous chromosomes, called the *obligatory crossover*. This means that each pair  
278 forms at least one crossover, crucial for the subsequent equilibrated segregation during  
279 meiosis I (reviewed in Wang et al., 2015). Taking advantage of super resolution structured  
280 illumination microscopy (SR-SIM), we investigated whether this principle was still fulfilled  
281 when M1AP was presumably dysfunctional (Figure 4C). MLH1 foci (dotted circles) were  
282 marked on each pair of homologous chromosomes from one representative spermatocyte of  
283 the man with a LoF variant in *M1AP* to localise the sites of crossovers. In total, 36 MLH1 foci  
284 were seen in this example, and all paired chromosomes showed at least one MLH1 focus,  
285 ensuring the obligatory crossover principle in this set of designated chromosomes.

### 286 **Men with LoF variants in *M1AP* can father healthy children by MAR**

287 Four of the ten men with LoF variants in *M1AP* tried to conceive via ICSI. Two men (M2062  
288 and 2746) were counselled about their genetic diagnosis before trying MAR. So far, only one  
289 man, M2746, has successfully fathered a healthy child following ICSI with ejaculated sperm.  
290 In the first and second ICSI attempts, oocyte fertilisation was possible, but cells did not  
291 develop to the blastocyst stage or did not lead to a clinical pregnancy. In the third attempt,  
292 nine oocytes were fertilised, seven of which developed up to the two-pronuclei (2N) stage.  
293 Two reached the blastocyst stage and were transferred to the female partner, after which  
294 one successfully implanted and developed normally, resulting in the birth of a healthy boy.  
295 Genome sequencing data of the child's genomic DNA compared to the father's demonstrated

## M1AP & meiotic recombination

---

296 the paternity and the inheritance of the *M1AP* frameshift variant in a heterozygous state  
297 (Figure 5A). In an ICSI-TESE attempt by M2062 and his female partner, three oocytes were  
298 fertilised, but none developed to the blastocyst stage and a transfer was not possible. For  
299 M3402 and his female partner, two ICSI attempts were not successful. For M3511, five  
300 spermatozoa were retrieved by TESE and used for ICSI; however, none of the five injected  
301 oocytes were fertilised.

302 To rule out any aneuploidies in the newborn boy, genome sequencing coverage data were  
303 analysed, and aberrations were excluded (Appendix Figure S14). Considering the exemplary  
304 case of M2746, ICSI with ejaculated spermatozoa or spermatozoa recovered from TESE  
305 offers the possibility of fatherhood for men with LoF variants in *M1AP* (Figure 5B).

306

307 **Discussion and conclusion**

308 Indications that *M1AP* is required for mammalian spermatogenesis date back to 2006, when  
309 the mouse orthologue was demonstrated to be expressed in male germ cells during the late  
310 stages of spermatogenesis (Arango et al., 2006). This was strengthened by two subfertile  
311 mouse models with predominant meiotic arrest, hinting toward the protein's role during male  
312 meiosis (Arango et al., 2013; Li et al., 2023). In addition, several human cases of male  
313 infertility have been described in which azoo-, crypto-, or extreme oligozoospermia have  
314 been associated with biallelic variants in *M1AP* (Wyrwoll et al., 2020; Tu et al., 2020; Li et al.,  
315 2023; Khan et al., 2023). Accordingly, *M1AP* has achieved a strong clinical gene-disease  
316 association based on the criteria of the Clinical Genome Resource (ClinGen) Gene Curation  
317 Working Group, and, therefore, we have proposed that this gene be included in routine  
318 diagnostics of infertile men (Wyrwoll et al., 2023a). Recently, *M1AP* was proposed as a  
319 fourth component of the mouse ZZS complex, linking its role to three well-known and highly  
320 conserved meiosis-related proteins: SHOC1, TEX11, and SPO16 (Li et al., 2023). In our  
321 study, we analysed the interaction between *M1AP* and the human ZZS proteins and showed  
322 that each ZZS protein bound to *M1AP* independently.

323 The men with LoF variants in *M1AP* investigated in this study displayed a predominant  
324 meiotic arrest with occasional haploid germ cells. Our in-depth characterisation of the  
325 patients' testicular phenotype implied a partial metaphase I arrest, which was also seen in  
326 another reported man with a *M1AP* LoF variant (Li et al., 2023). In addition, we observed the  
327 activation of the spindle-assembly checkpoint, which is crucial for preventing premature  
328 chromosome separation and, thus, abnormal segregation and aneuploidies (reviewed in  
329 Lane and Kauppi, 2019). Accordingly, meiotic recombination was presumably intact in  
330 individual cells that progressed beyond this checkpoint. As such, an individual fertilisation-  
331 competent spermatozoon was allowed to develop, ultimately resulting in the birth of a  
332 healthy, euploid child.

## M1AP & meiotic recombination

---

333 These findings in humans mimic the *M1ap* knockout mouse model, which was also  
334 characterised by male subfertility (Li et al., 2023) with lower sperm counts and an increased  
335 number of arrested metaphase I cells with unaligned chromosomes. Here, fewer  
336 recombination intermediates and reduced crossover events led to metaphase I arrest and  
337 cellular apoptosis, and, consistent with the human variant carriers' phenotype, only a fraction  
338 of cells progressed to fertility-competent spermatozoa.

339 In humans, *SHOC1* and *TEX11*, which encode two of the M1AP binding partners in the  
340 meiotic ZZS complex, have also previously been associated with male infertility and meiotic  
341 arrest (Krausz et al., 2020; Yatsenko et al., 2015), and both genes represent validated  
342 disease genes for male infertility (Wyrwoll et al., 2023a). In contrast to *M1AP*, hemizygous  
343 and biallelic LoF variants in these genes, respectively, have primarily been associated with a  
344 complete lack of haploid germ cells (Yatsenko et al., 2015; Krausz et al., 2020). However,  
345 the evaluation of the testicular phenotype in these initial reports was based on testicular  
346 overview staining, making a definitive conclusion difficult. In this study, we concordantly  
347 observed complete meiotic arrest and a lack of haploid, CREM-positive germ cells in all men  
348 we analysed with LoF variants in *TEX11*, pointing to an activation of the first, the pachytene,  
349 checkpoint (Yatsenko et al., 2015; Yu et al., 2021) and to an invariable genotype-phenotype  
350 correlation. This congruent phenotype was also observed in two men with LoF variants in  
351 *SHOC1*. Only in one further patient with a homozygous splice site variant in *SHOC1* did we  
352 detect CREM-positive round spermatids. This splice site variant is predicted to induce an in-  
353 frame deletion of a single exon, such that the resulting protein may still have reduced  
354 function, as described for comparable yeast and mice mutants (De Muyt et al., 2018;  
355 Guiraldelli et al., 2018).

356 In contrast to *TEX11* and *SHOC1*, biallelic variants in *SPO16* have so far only been linked to  
357 female infertility (Qi et al., 2023); thus, our study demonstrates the first case of an infertile  
358 man with a biallelic LoF variant in *SPO16*, highlighting it as a novel candidate gene also for  
359 male infertility. The arrest phenotype correlates with the phenotype of *TEX11* and *SHOC1*

## M1AP & meiotic recombination

---

360 variant carriers, where no haploid germ cells were detected. Again, persistent DSBs and lack  
361 of complete synapsis were evident. As such, crossover resolution was absent, resulting in a  
362 complete meiotic arrest. In conclusion, in-depth testicular characterisation of the large  
363 number of men with LoF variants in *TEX11* points to a genotype-specific phenotype that  
364 correlates with the phenotype of the other two key ZZS genes, *SHOC1* and *SPO16*.  
365 However, further identification of cases is needed to fully understand how the loss of *SHOC1*  
366 and *SPO16* function affects meiotic progression.

367 Our observations on human cases are substantiated by described mouse models targeting  
368 the orthologues of the respective genes, which displayed sterility and an early spermatocyte  
369 arrest (Yang et al., 2008; Zhang et al., 2019, 2018). *Tex11* knockout mice were associated  
370 with male sterility due to apoptosis of spermatocytes, asynapsis of homologues, delayed  
371 DSB repair, and a decreased number of crossover events (Yang et al., 2008). Both complete  
372 and germ cell-specific knockout of *Shoc1* resulted in sterility. Germ cell arrest varied between  
373 zygotene and mid-pachytene stages, and cells lacked distinct XY bodies, complete  
374 chromosomal synapsis, and crossover events (Zhang et al., 2018). Homozygous knockout of  
375 *Spo16* in mice led to sterility, impaired chromosome pairing, and reduced crossover  
376 formation (Zhang et al., 2019). Compared to *Shoc1*, the *Spo16* knockout mice displayed  
377 milder defects in DSB repair and synapsis, indicating that *SHOC1* alone maintains partially  
378 functionality and enables reduced DSB repair.

379 The common basis of all four genes *M1AP*, *SHOC1*, *TEX11*, and *SPO16*, is male infertility  
380 and meiotic arrest in the case of a loss of protein function. However, this study identified  
381 striking differences in the testicular phenotype of men with LoF variants in *M1AP* in contrast  
382 to those patients affected by LoF variants in the main ZZS complex genes *SHOC1*, *TEX11*,  
383 and *SPO16*. To explain why *M1AP* deficiency still allows a fraction of germ cells in men and  
384 mice to progress through meiosis to the haploid germ cell stage, we argue that even in the  
385 absence of *M1AP*, a reduced *SHOC1*-*TEX11*-*SPO16* interplay is maintained: *SHOC1* forms  
386 a heterodimer with *SPO16* that recognises DNA-joined molecules and binds to and stabilises



## M1AP & meiotic recombination

---

387 early recombination intermediates (Guiraldelli et al., 2018; Zhang et al., 2019). TEX11 is  
388 recruited to these sites and, in turn, assists in recruiting meiosis-specific proteins such as  
389 SYCP2 and MutSy (MSH4-MSH5), which are needed to facilitate synaptonemal complex  
390 assembly and DSB repair, finally yielding to crossover formation (Yang et al., 2008; Zhang et  
391 al., 2018).

392 Our findings indicate that M1AP is an important catalyser for promoting meiotic resolution in  
393 the ZZS network, but it is not mandatory. This is supported by the fact that although meiosis  
394 is an evolutionarily highly conserved process (reviewed in Börner et al., 2023), and,  
395 accordingly, the ZZS proteins Zip2 (SHOC1), Zip4 (TEX11), and Spo16 (SPO16) play an  
396 essential role in meiotic recombination in yeast, this lower eukaryote has no M1AP  
397 orthologue. While yeast is a well-established model organism for meiosis, M1AP is only  
398 conserved down to fish species, indicating that this protein's function in meiotic progression  
399 is evolutionarily younger than those of the ZZS complex.

400 In contrast to male meiosis in mice and humans, where deficiency in M1AP or ZZS complex  
401 components results in subfertility or infertility, the role of these proteins in female fertility is  
402 less clear. In mice, female *M1ap* and *Tex11* knockouts are fertile, albeit with a reduced litter  
403 size in the case of *Tex11* knockout (Arango et al., 2013; Li et al., 2023; Yang et al., 2008).  
404 Murine *Shoc1* and *Spo16* knockouts display sterility in both sexes (Zhang et al., 2019, 2018),  
405 and in humans, biallelic LoF variants in *SHOC1* and *SPO16* have been described to lead to  
406 female infertility. For *TEX11*, only women with heterozygous variants have been found to  
407 retain their fertility (Wyrwoll et al., 2023a). For *M1AP*, however, because we and others have  
408 not identified biallelic variants in *M1AP* in fertile or infertile women, we cannot yet define the  
409 role of M1AP in human female meiosis.

410 *M1AP* is a clinically relevant gene for male fertility. The TESE success rate in our cohort was  
411 40%, and we described one man who fathered a healthy, euploid child, thus showing that  
412 biallelic LoF variants in *M1AP* are compatible with fatherhood. However, further studies are  
413 needed to fully elucidate the underlying molecular mechanisms and enable a risk estimation

## M1AP & meiotic recombination

---

414 of checkpoint failure and aneuploidy in these men. Accordingly, it currently remains elusive  
415 whether all altered cells in men with LoF variants in *M1AP* indeed undergo checkpoint-  
416 induced apoptosis or whether rare exceptions develop independently of the spindle-  
417 assembly checkpoint resulting in aneuploid spermatozoa.

418 The majority of aneuploid embryos are not viable, frequently leading to spontaneous abortion  
419 (Hassold and Hunt, 2001). While studies have suggested an equal fertilisation capability  
420 between aneuploid and euploid spermatozoa, they have also evidenced a correlation  
421 between high sperm aneuploidy and recurrent ICSI or MAR failure as well as lower rates of  
422 pregnancy and live birth (reviewed in Ioannou et al., 2019). ICSI attempts with spermatozoa  
423 from two men with LoF variants in *M1AP* (M2062 and M2746) succeeded in fertilising the  
424 oocytes. Most of these did, however, not develop to the blastocyst stage or did not lead to a  
425 clinical pregnancy. Aneuploid spermatozoa could be one potential explanation for this,  
426 especially concerning chromosomes 21, 22, X, and Y, as these typically have a single  
427 recombination event and are, thus, more prone to progress without the obligatory crossover  
428 (Ferguson et al., 2007; Sun et al., 2008). This hypothesis could not be substantiated by our  
429 data, because we could not perform a direct analysis of the very few spermatozoa from any  
430 of the men to assess the frequency of aneuploidies. Thus, subsequent studies are needed to  
431 answer this question. So far, couples with M1AP-related male-factor infertility should be  
432 counselled about such potential risks and could benefit from preimplantation genetic testing  
433 for aneuploidy (PGT-A). Whereas the benefits of PGT-A in unexplained recurrent pregnancy  
434 failure cases remain uncertain, some studies focussing on male-factor infertility have shown  
435 improved clinical MAR outcomes after PGT-A (Rodrigo et al., 2019; Xu et al., 2021) – and  
436 M1AP-associated infertility may be such a case.

437 Both *M1AP* and *TEX11* represent two of the most frequently identified monogenic causes for  
438 NOA in men (Yang et al., 2015; Nagirnaja et al., 2022; Wyrwoll et al., 2023b). By identifying  
439 the first man with an underlying LoF variant in *SPO16*, we expand the clinical relevance of  
440 genetic causes to all three main ZZS genes and underline their overall importance. Here, we

## M1AP & meiotic recombination

---

441 present the first detailed description of the testicular phenotypes of affected men, which is  
442 important for inferring the function of the proteins involved. At least for *M1AP* and *TEX11*, we  
443 provide for the first time a clear genotype-phenotype correlation, as men with LoF in the  
444 same gene show a concordant phenotype. As a result, it will now be possible to distinguish  
445 likely pathogenic variants in *TEX11* and *M1AP* from likely benign variants, i.e., those less  
446 likely to have a functional effect. Specifically, pathogenic missense variants in these genes  
447 leading to abolished protein function are expected to lead to the described, highly specific  
448 testicular phenotype. To the best of our knowledge, our study is also the first report on the  
449 birth of a healthy child (reviewed in Xie et al., 2022) having a father with a pathogenic gene  
450 variant in a clinically established disease gene for NOA. This not only distinguishes *M1AP*  
451 from other NOA genes, but it also shows that human M1AP, in contrast to the other ZZS  
452 proteins, is not required for meiotic recombination.

453 **Material/subjects and methods**

454 **Study cohort**

455 The Male Reproductive Genomics (MERGE) study comprised exome (N=2,629) and genome  
456 sequencing (N=74) datasets of overall 2,703 probands (for details see Appendix Methods). It  
457 includes men with various infertility phenotypes: 1,622 men with azoospermia (no  
458 spermatozoa in the ejaculate, HP:0000027), 487 men with cryptozoospermia (spermatozoa  
459 only identified after centrifugation, HP:0030974), 380 men with varying oligozoospermia (total  
460 sperm count: >0 to <39 million spermatozoa, HP:0000798), 188 men with a total sperm count  
461 above 39 million, and 26 family members. Established causes for male infertility including  
462 previous radio- or chemotherapy, hypogonadotropic hypogonadism, Klinefelter syndrome, or  
463 microdeletions of the azoospermia factor (AZF) regions on the Y-chromosome were  
464 exclusion criteria. All men underwent routine physical and hormonal analysis of luteinising  
465 hormone (LH), follicle-stimulating hormone (FSH), testosterone (T) as well as semen  
466 analysis according to the respective WHO guidelines.

467 For this study, we selected men with rare biallelic (minor allele frequency [MAF] in gnomAD  
468 database v2.1.1,  $\leq 0.01$ ) or hemizygous (MAF  $\leq 0.001$ ) loss-of-function (LoF) variants (stop-,  
469 frameshift-, splice site variants) and deletions in *M1AP*, *SHOC1* [*C9orf84*], *TEX11*, and  
470 *C1orf146* [*SPO16*]. For consistency in the manuscript, we used the HGNC  
471 (<https://www.genenames.org/>) approved gene symbols for *M1AP*, *SHOC1*, and *TEX11*,  
472 whereas we refer to *C1orf146* using its alias gene symbol, *SPO16*. As a reference, the  
473 longest transcript with the highest testicular expression was chosen (*M1AP*:  
474 NM\_001321739.2, *SHOC1*: NM\_173521.5, *TEX11*: NM\_1003811.2, *SPO16*:  
475 NM\_001012425.2). If possible, segregation analysis was conducted on the DNA of family  
476 members. Samples with qualitatively and quantitatively normal spermatogenesis were  
477 included as controls (M2132, M2211, M3254, Appendix Figure S15, statistical analyses). In  
478 addition, one previously published case from an external cohort (GEMINI-377, referred to as  
479 G-377) was included for subsequent analysis (Nagirnaja et al., 2022).

480 **Ethical approval**

481 All individuals gave written informed consent compliant with local requirements. The MERGE  
482 study was approved by the Ethics Committee of the Ärztekammer Westfalen-Lippe and the  
483 Medical Faculty Münster (Münster #2010-578-f-S, #2012-555-f-S; Giessen #26/11); the study  
484 of GEMINI-377 was approved by the ethics committee for the Capital Region in Denmark  
485 (#H-2-2014-103), all in accordance with the Helsinki Declaration of 1975.

486 **Cell culture and transient (co-)transfection experiments**

487 Human embryonic kidney (HEK) 293T cells were cultured in Dulbecco's modified Eagle  
488 medium (DMEM) with 10% foetal calf serum (FCS) and 1% penicillin/streptomycin (PS). The  
489 culture was maintained in T75 cell culture flasks at 37°C, 5% CO<sub>2</sub>, and 85% humidity.

490 For overexpression experiments, 400,000 cells per well were seeded in 6-well plates,  
491 cultivated for two days in DMEM-FCS without PS, and transfected at 80-100% confluence  
492 using the K2® transfection system (Biontex, #T060) according to the manufacturer's  
493 instructions. Briefly, K2® maximiser reagent was added two hours before transfection.  
494 Directly before transfection, the medium was supplemented with 100 µm chloroquine  
495 diphosphate salt (Sigma-Aldrich, #C6628). Subsequently, 4 µg cDNA, 260 µl Opti-MEM™  
496 reduced serum medium (Gibco, #31985062), and 9 µl K2® transfection reagent per well  
497 were mixed, incubated for 15 minutes, and added to the cells. For co-transfection of DYK-  
498 tagged *M1AP* (NM\_001321739.2) and either HA-tagged *SHOC1* (NM\_173521.5), *TEX11*  
499 (NM\_031276.3), or *SPO16* (NM\_001012425.2), the total amount of DNA was maintained,  
500 and the cDNA ratio was adapted according to the respective size of each gene. Transfection  
501 and subsequent analysis were performed in three independent replicates minimum and three  
502 wells were pooled per replicate.

503 Cell lysis was performed 24 hours post-transfection. Accordingly, cells were washed with  
504 1x PBS and collected in a microcentrifuge tube on ice. After centrifugation (4°C, 5 minutes,  
505 200 rpm), cells were re-suspended with co-IP lysis buffer (25 mM Tris-HCl pH 7.4, 150 mM  
506 NaCl, 10 mM EDTA, 1% NP-40, 5% glycerol) and supplemented with 1x EDTA-free protease

## M1AP & meiotic recombination

---

507 inhibitor cocktail (Roche, #11836170001). Samples were incubated for 15 minutes on ice and  
508 collected by centrifugation (4°C, 15 minutes, 13000 rpm). The protein-containing supernatant  
509 was transferred to a fresh microcentrifuge tube and directly processed or stored at –20°C  
510 until further usage. When co-immunoprecipitation was conducted, a small amount of lysate  
511 was kept for the ‘input’ protein validation.

### 512 **Co-immunoprecipitation**

513 Co-immunoprecipitation protocols were optimised and, depending on the respective protein-  
514 protein interaction, two different types of magnetic beads were used for this study: Pierce™  
515 magnetic anti-DYKDDDDK tag beads (Thermo Scientific, #A36797) for M1AP-SPO16 or anti-  
516 HA tag beads (Thermo Scientific, #88838) for M1AP-SHOC1 as well as M1AP-TEX11.  
517 Beads were equilibrated and pre-cleared according to the instructions and incubated with  
518 respective protein lysates for 30 minutes at RT under gentle rotation. Anti-DYKDDDDK  
519 beads were washed with 1x PBS three times; anti-HA beads were washed with 0.025% TBS-  
520 Tween six times, and both were washed with double distilled water once. Gentle elution was  
521 achieved by incubation with a Pierce™ 3x DYKDDDDK peptide (Thermo Scientific, #A36806)  
522 at 1.5 mg/ml in 1x PBS for 5 minutes shaking or by using the Pierce™ elution buffer (pH 2,  
523 Thermo Scientific, #21028) for 8 minutes. Beads were collected with a magnetic stand and  
524 supernatants contained the eluted targets. Co-IP runs with pure bait lysates served as  
525 negative controls. Samples were either stored at –20°C or processed directly.

### 526 **Western blotting**

527 Protein samples of either co-transfected DYK-*M1AP*, HA-*SHOC1*, HA-*TEX11*, or HA-*SPO16*,  
528 ‘input’ samples of co-IP eluates, or singularly transfected bait IP controls were pre-mixed 1:4  
529 with 4x Laemmli sample buffer (Bio-Rad, #1610747) supplemented with DTT (Merck,  
530 #10197777001) and incubated at 95°C, 10 minutes for denaturation. Protein separation was  
531 achieved using 4–15% mini-PROTEAN® TGX Stain-Free™ precast gels (Bio-Rad,  
532 #4568085) for SDS polyacrylamide gel electrophoresis (SDS-PAGE). Proteins were  
533 transferred to a PVDF membrane using the Trans-Blot® Turbo™ mini PVDF transfer packs

## M1AP & meiotic recombination

---

534 (Bio-Rad, #1704156EDU) following the manufacturer's instructions. Subsequently,  
535 membranes were blocked with 5% milk powder solution in 0.025% TBS-Tween for  
536 30 minutes at room temperature (RT). Incubation of primary antibody diluted in blocking  
537 solution was performed overnight at 4°C. Antibody details are listed in Appendix Table S3.  
538 Between the incubation steps, washing with 0.1% TBS-Tween was included. Peroxidase-  
539 conjugated secondary antibody incubation followed. Visualisation was achieved by a  
540 chemiluminescence reaction using the Clarity™ Western ECL substrate kit (Bio-Rad,  
541 #1705060S) and the ChemiDoc MP imaging system (Bio-Rad, #12003154). The molecular  
542 weights of analysed proteins were calculated using a PageRuler™ plus prestained protein  
543 ladder (Thermo Scientific, #26619) and image procession was performed using the Bio-Rad  
544 image lab software and molecular weight analysis tool (Bio-Rad, #12012931). Samples  
545 shown in one figure were derived from the same experiment.

### 546 **Histological evaluation of testicular biopsies**

547 Testis biopsies of men with variants in *M1AP* or one of the ZZS genes and of control subjects  
548 were obtained from testicular sperm extraction (TESE) approaches or histological  
549 examinations at the Department of Clinical and Surgical Andrology of the CeRA, Münster, or  
550 at the Clinic for Urology, Gießen, and were included for in-depth histological phenotyping.  
551 Tissue samples were either snap-frozen, cryo-preserved (Sperm-Freeze™, Ferti-Pro,  
552 #3080), or fixed in Bouin's solution, paraformaldehyde (PFA), or GR fixative overnight. Fixed  
553 samples were washed with 70% ethanol and embedded in paraffin for routine histological  
554 examination. Tissues were sectioned at 5 µm and stained with Periodic acid-Schiff (PAS) or  
555 haematoxylin and eosin (H&E) according to standard protocols. If no differences between  
556 biopsies were observed, further analysis focused on one biopsy per case. In addition, the  
557 most advanced germ cell type was quantified, representing the percentage of elongated  
558 spermatids (ES), round spermatids (RS), spermatocytes (SPC), spermatogonia (SPG),  
559 Sertoli cell-only (SCO), and hyalinised tubules (tubular shadows, TS) per section.

560 **Immunohistochemical staining of human testicular tissue sections**

561 For immunohistochemistry (IHC), biopsy samples were sectioned at 3 µm and incubated in  
562 Neo-Clear™ (Sigma-Aldrich, #109843) for de-paraffinisation. Re-hydration was performed in  
563 a descending ethanol row (99%, 98%, 80%, and 70% EtOH, respectively). Between  
564 individual incubation steps, washing was performed using Tris-buffered saline (1x TBS).  
565 Incubation and washing steps were performed at RT, if not stated otherwise. Heat-induced  
566 antigen retrieval followed at 90°C, using either sodium citrate buffer (pH 6, Thermo Scientific,  
567 #005000) or Tris-EDTA buffer (pH 9, Zytomed Systems, #ZYT-ZUC029), depending on the  
568 respective antibodies' specifications. Blocking of endogenous peroxidase activity and  
569 unspecific antibody binding was achieved by incubation in 3% hydrogen peroxidase (H<sub>2</sub>O<sub>2</sub>,  
570 Pharmacy of the University Hospital Münster, #1002187) for 15 minutes and in 25% normal  
571 goat serum (abcam, #ab7481) diluted in TBS containing 0.5% bovine serum albumin (BSA,  
572 Merck, #A9647) for 30 minutes. Primary antibodies were diluted in 5% BSA-TBS and  
573 incubated in a humid chamber at 4°C overnight, if not stated otherwise (for antibody details  
574 see Appendix Table S3). Round spermatid arrest was scrutinised by cAMP responsive  
575 element modulator (CREM) expression. Apoptosis of germ cells was analysed by TUNEL  
576 assay, following the manufacturer's instructions (Thermo Scientific, #C10625). The  
577 progression of meiosis I was evaluated by phospho-histone H2A.X (γH2AX) staining.  
578 Metaphase cells were detected by phosphorylation of serine 10 on histone H3 (H3S10p).  
579 Incubation with unspecific immunoglobulin G (IgG) adapted to the primary antibody host  
580 system or omission of the first antibody (OC) served as negative controls (Appendix  
581 Figure S15). A secondary, biotinylated goat anti-rabbit (abcam, #ab6012) or goat anti-mouse  
582 antibody (abcam, #ab5886) was incubated for one hour, followed by conjugation with  
583 streptavidin–horseradish peroxidase (HRP, Sigma-Aldrich, #S5512) for 45 minutes.  
584 Peroxidase activity was visualised by 3,3'-diaminobenzidine tetrahydrochloride (DAB, Sigma-  
585 Aldrich, #D5905) incubation for 1–20 minutes according to evaluation by microscope. The  
586 reaction was stopped in double distilled water. Counterstaining was performed with Mayer's  
587 haematoxylin (Sigma-Aldrich, #1092491000). De-hydration followed using increasing EtOH



## M1AP & meiotic recombination

---

588 concentrations and finally, slides were cleared with Neo-Clear™ and mounted with glass  
589 coverslips using M-GLAS® liquid cover glass medium (Merck, #1.03973).

### 590 **Meiotic spermatocyte spreading**

591 Analysis of the effects of LoF variants in *M1AP*, *SHOC1*, *TEX11*, and *SPO16* on meiosis was  
592 assessed on a single-cell level by meiotic spermatocyte spreading and subsequent  
593 immunofluorescence staining. For this, snap-frozen or cryo-preserved (Sperm-Freeze™,  
594 Ferti-Pro, #3080) testis samples were used (N=1 per gene [*M1AP*: M864, *SHOC1*: M2046,  
595 *TEX11*: M3409, *SPO16*: M3863]). Processing was executed at RT if not stated otherwise. All  
596 solutions were filtrated using a 0.2 µm filter. Samples were handled in 1x Dulbecco's  
597 phosphate-buffered saline (D-PBS, Sigma-Aldrich, #14190) supplemented with 1.1 mM  
598 CaCl<sub>2</sub>, 0.52 mM MgCl<sub>2</sub>, and sodium DL-lactate solution (D-PBS<sup>+</sup>). Seminiferous tubules were  
599 mechanically dissected using two forceps and collected in 5 ml D-PBS<sup>+</sup>. Tubular remnants  
600 were allowed to settle for 5 minutes and supernatant was collected in a fresh tube.  
601 Centrifugation was performed for 5 minutes at 1000 rpm twice. The supernatant was  
602 discarded and the cell/nuclei pellet was re-suspended in D-PBS<sup>+</sup> to reach 15x10<sup>6</sup> cells per  
603 ml. Of this, 10 µl were mixed with 20 µl 100 mM sucrose (Thermo Scientific, #10134050) and  
604 dribbled on slides previously cleaned and dipped in freshly prepared 1% PFA (Merck,  
605 #158127, pH 9.2 set with 10 mM sodium borate, Roth, #8643) solution containing 0.15%  
606 Triton X-100 for fixation. Drying was performed for 90 minutes in a humid chamber with a  
607 closed lid and for another 45 minutes with the lid opened. Slides were washed with  
608 0.08% Photo-Flo (Kodak, #K1464510) solution for 10 seconds and dried completely. Either,  
609 immunofluorescence staining was performed directly or slides were stored at -80°C until  
610 further processing followed.

### 611 **Immunofluorescence staining on spermatocyte spreads**

612 Slides were defrosted for 15 minutes at RT and washed with 1x PBS three times. All  
613 solutions were filtrated using a 0.2 µm filter. The staining was divided into two parts to avoid  
614 cross reactions and minimise foci-like background. First, non-specific binding was reduced

## M1AP & meiotic recombination

---

615 via blocking with 5% glycine (Sigma-Aldrich, #G7126), 0.3% Triton-X (Sigma-Aldrich,  
616 #T8787), and 0.01% sodium acid ( $\text{NaN}_3$ , Sigma-Aldrich, #S2002) in PBS containing 5%  
617 normal donkey serum (Merck, #S30). Rabbit, mouse, and goat primary antibodies were  
618 diluted in 0.3% Triton-X and 0.01%  $\text{NaN}_3$ -PBS-Tween and successively incubated overnight  
619 at 4°C, for 30 minutes at RT, and 15 minutes at 37°C in a humid chamber. Subsequently,  
620 slides were washed five times in PBS and antibodies were coupled with fluorophore-  
621 conjugated secondary antibodies for three hours at RT. Additional blocking steps followed:  
622 first in blocking solution with 5% normal donkey serum, second with 5% normal goat serum  
623 (both for 15 minutes at RT), and third by using 50  $\mu\text{g}/\text{ml}$  anti-human Fab fragments in PBS  
624 (JacksonImmuno Research, #109-007-003) for 60 minutes at RT in a humid chamber. Next,  
625 a second primary antibody incubation was performed using human anti-centromere antisera  
626 (ACA, antibodiesinc, #15-234) and coupled with an anti-human fluorophore-conjugated  
627 secondary antibody for 30 minutes at RT as well as for one hour at 37°C. Finally, slides were  
628 washed five times in PBS and mounted with ROTI® mount FluorCare medium (Roth,  
629 #HP19.1). Antibody details are provided in Appendix Table S3.

### 630 **Image acquisition, processing, and digital data generation**

631 Immunohistochemical staining was captured with an Olympus BX61VS microscope and the  
632 corresponding scanner software VS-ASW-S6, the PreciPoint O8 scanning microscope  
633 system, or a Leica DM750 microscope and the Leica ICC50 HD camera.  
634 Immunofluorescence staining of meiotic spreads was complied with a Zeiss Elyra 7  
635 microscope for specialised 3D structured illumination ( $\text{SIM}^2$ ) and the Zeiss Zen black  
636 software. Suitable filter sets (DAPI / GFP / TXR / Y5) were used to visualise fluorophore-  
637 based antibody staining.

638 Image processing was achieved with the open-source software Fiji by ImageJ (v2.3.0/1.54h).  
639 For down-streaming processing of images, pictures were cropped to desired sizes to ensure  
640 a representative understanding of the testicular architecture or to allow focussed visualisation  
641 of specific details. Meiotic progression was analysed by  $\gamma\text{H2AX}$  localisation, and the tubules

## M1AP & meiotic recombination

---

642 of one cross section of each case were characterised by their most advanced prophase I  
643 stage. CREM- or TUNEL-positive cells were counted per tubule per cross section and  
644 presented as average number of positive cells per tubule. Crossover events were quantified  
645 for pachytene spermatocytes spreads (only possible for control, M1AP), by counting the  
646 MLH1 foci per one spermatocyte. Proper chromosome preservation was confirmed by ACA  
647 staining. Prophase I stages were confirmed by SYCP1 / γH2AX staining. A minimum of ten  
648 pachytene spermatocytes were analysed per case.

### 649 **Data availability**

650 Sequencing data of the MERGE study is available by contacting the Institute of Reproductive  
651 Genetics (<https://reprogenetik.de>). Access to this data is limited for each case and specific  
652 consent of the respective samples. All novel variants have been submitted to ClinVar  
653 (SCV004708228 - SCV004708242).

### 654 **Acknowledgements**

655 We kindly thank all probands and their families for providing data, samples, and their  
656 contents which are the foundation of our interdisciplinary biomedical research. Thomas Zobel  
657 and the team from the [Multiscale Imaging Centre](#), University of Münster is thanked for his  
658 excellent and professional support in SR-SIM microscopy (Elyra Zeiss Programmnummer  
659 INST 211/901-1 FUGB). The authors thank Celeste Brennecke for language editing. In  
660 addition, we thank the following people for their valuable and professional support: Pascal  
661 Hauser, Lena Schilling, Luisa Meier, Christina Burhöi, Alexandra Hax, Jochen Wistuba,  
662 Reinhild Sandhowe, Willy Baarends, Lieke Koordneef, Esther Sleddens, Antoine Peters,  
663 Rita Exeler, Katja Poorthuis, Adelheid Kersebom, Elke Kößer, Sophie Koser, Claudia  
664 Krallmann, and Margot Wyrwoll.

### 665 **Funding**

666 This study was carried out within the frame of the German Research Foundation-funded  
667 Clinical Research Unit 'Male Germ Cells' (DFG CRU326, project number 329621271) to CF,

M1AP & meiotic recombination

---

668 FT, NN and the German Academic Exchange Service (DAAD) to FT and MOB (project ID  
669 57511796).

670 **Conflict of interest**

671 The authors declared no conflict of interest.

672 **Author contributions**

673 All authors revised and approved the final version of the manuscript. NR and CF conceived  
674 and designed the experiments and wrote the manuscript. NR, JD, MDR, JK, AKD, SBW  
675 performed the experiments. NR, JD, SDP, CR analysed the data. VN provided the MAR  
676 data. DF, AP, NN, HCS, KA, SK, FT performed the case recruiting as well as clinical and  
677 histological evaluation. BS, MOB, FT, CF provided critical feedback and supported this work  
678 by shaping research progress and final results.

679 **References**

- 680 Arango, N.A., Huang, T.T., Fujino, A., Pieretti-Vanmarcke, R., Donahoe, P.K., 2006.  
681 Expression analysis and evolutionary conservation of the mouse germ cell-specific  
682 D6Mm5e gene. *Dev. Dyn.* 235, 2613–2619.
- 683 Arango, N.A., Li, L., Dabir, D., Nicolau, F., Pieretti-Vanmarcke, R., Koehler, C., McCarrey,  
684 J.R., Lu, N., Donahoe, P.K., 2013. Meiosis I arrest abnormalities lead to severe  
685 oligozoospermia in meiosis 1 arresting protein (M1ap)-deficient mice. *Biol. Reprod.* 88,  
686 1–11.
- 687 Baker, S.M., Plug, A.W., Prolla, T.A., Bronner, C.E., Harris, A.C., Yao, X., Christie, D.M.,  
688 Monell, C., Arnheim, N., Bradley, A., Ashley, T., Liskay, R.M., 1996. Involvement of  
689 mouse Mlh1 in DNA mismatch repair and meiotic crossing over. *Nat. Genet.* 13, 336–  
690 342.
- 691 Börner, G.V., Hochwagen, A., MacQueen, A.J., 2023. Meiosis in budding yeast. *Genetics*  
692 225, 1–33.
- 693 Börner, G.V., Kleckner, N., Hunter, N., 2004. Crossover/noncrossover differentiation,  
694 synaptonemal complex formation, and regulatory surveillance at the leptotene/zygotene  
695 transition of meiosis. *Cell* 117, 29–45.
- 696 De Muyt, A., Pyatnitskaya, A., Andréani, J., Ranjha, L., Ramus, C., Laureau, R., Fernandez-  
697 Vega, A., Holoch, D., Girard, E., Govin, J., Margueron, R., Couté, Y., Cejka, P., Guérois,  
698 R., Borde, V., 2018. A meiotic XPF–ERCC1-like complex recognizes joint molecule  
699 recombination intermediates to promote crossover formation. *Genes Dev.* 32, 283–296.
- 700 Di Persio, S., Tekath, T., Siebert-Kuss, L.M., Cremers, J.F., Wistuba, J., Li, X., Meyer zu  
701 Hörste, G., Drexler, H.C.A., Wyrwoll, M.J., Tüttelmann, F., Dugas, M., Kliesch, S.,  
702 Schlatt, S., Laurentino, S., Neuhaus, N., 2021. Single-cell RNA-seq unravels alterations  
703 of the human spermatogonial stem cell compartment in patients with impaired

M1AP & meiotic recombination

---

- 704 spermatogenesis. *Cell Reports Med.* 2, 100395.
- 705 Dunce, J.M., Dunne, O.M., Ratcliff, M., Millán, C., Madgwick, S., Usón, I., Davies, O.R.,  
706 2018. Structural basis of meiotic chromosome synapsis through SYCP1 self-assembly.  
707 *Nat. Struct. Mol. Biol.* 25, 557–569.
- 708 Enguita-Marruedo, A., Sleddens-Linkels, E., Ooms, M., de Geus, V., Wilke, M., Blom, E.,  
709 Dohle, G.R., Looijenga, L.H.J., van Cappellen, W., Baart, E.B., Baarends, W.M., 2019.  
710 Meiotic arrest occurs most frequently at metaphase and is often incomplete in  
711 azoospermic men. *Fertil. Steril.* 112, 1059-1070.e3.
- 712 Ferguson, K.A., Wong, E.C., Chow, V., Nigro, M., Ma, S., 2007. Abnormal meiotic  
713 recombination in infertile men and its association with sperm aneuploidy. *Hum. Mol.*  
714 *Genet.* 16, 2870–2879.
- 715 Fernandez-Capetillo, O., Mahadevaiah, S.K., Celeste, A., Romanienko, P.J., Camerini-Otero,  
716 R.D., Bonner, W.M., Manova, K., Burgoyne, P., Nussenzweig, A., 2003. H2AX is  
717 required for chromatin remodeling and inactivation of sex chromosomes in male mouse  
718 meiosis. *Dev. Cell* 4, 497–508.
- 719 Guiraldelli, M.F., Felberg, A., Almeida, L.P., Parikh, A., de Castro, R.O., Pezza, R.J., 2018.  
720 SHOC1 is a ERCC4-(HhH)2-like protein, integral to the formation of crossover  
721 recombination intermediates during mammalian meiosis. *PLoS Genet.* 14, e1007381.
- 722 Hamer, G., Roepers-Gajadien, H.L., Van Duyn-Goedhart, A., Gademan, I.S., Kal, H.B., Van  
723 Buul, P.P.W., De Rooij, D.G., 2003. DNA double-strand breaks and  $\gamma$ -H2AX signaling in  
724 the testis. *Biol. Reprod.* 68, 628–634.
- 725 Hassold, T., Hunt, P., 2001. To err (meiotically) is human: The genesis of human aneuploidy.  
726 *Nat. Rev. Genet.* 280-291.
- 727 Ioannou, D., Fortun, J., Tempest, H.G., 2019. Meiotic nondisjunction and sperm aneuploidy

M1AP & meiotic recombination

---

- 728 in humans. *Reproduction*. 157:R15-R31.
- 729 Jan, S.Z., Jongejan, A., Korver, C.M., van Daalen, S.K.M., van Pelt, A.M.M., Repping, S.,  
730 Hamer, G., 2018. Distinct prophase arrest mechanisms in human male meiosis. *Dev.*  
731 145, dev160614.
- 732 Jones, G.H., 1984. The control of chiasma distribution. *Symp. Soc. Exp. Biol.* 38, 293–320.
- 733 Ke, H., Tang, S., Guo, T., Hou, D., Jiao, X., Li, S., Luo, W., Xu, B., Zhao, S., Li, G., Zhang,  
734 X., Xu, S., Wang, L., Wu, Y., Wang, J., Zhang, F., Qin, Y., Jin, L., Chen, Z.J., 2023.  
735 Landscape of pathogenic mutations in premature ovarian insufficiency. *Nat. Med.* 29,  
736 483–492.
- 737 Khan, M.R., Akbari, A., Nicholas, T.J., Castillo-Madeen, H., Ajmal, M., Haq, T.U., Laan, M.,  
738 Quinlan, A.R., Ahuja, J.S., Shah, A.A., Conrad, D.F., 2023. Genome sequencing of  
739 Pakistani families with male infertility identifies deleterious genotypes in SPAG6,  
740 CCDC9, TKTL1, TUBA3C, and M1AP. *Andrology* 1–12.
- 741 Krausz, C., Riera-Escamilla, A., Moreno-Mendoza, D., Holleman, K., Cioppi, F., Algaba, F.,  
742 Pybus, M., Friedrich, C., Wyrwoll, M.J., Casamonti, E., Pietroforte, S., Nagirnjaja, L.,  
743 Lopes, A.M., Kliesch, S., Pilatz, A., Carrell, D.T., Conrad, D.F., Ars, E., Ruiz-Castañé,  
744 E., Aston, K.I., Baarends, W.M., Tüttelmann, F., 2020. Genetic dissection of  
745 spermatogenic arrest through exome analysis: clinical implications for the management  
746 of azoospermic men. *Genet. Med.* 22, 1956–1966.
- 747 Lane, S., Kauppi, L., 2019. Meiotic spindle assembly checkpoint and aneuploidy in males  
748 versus females. *Cell. Mol. Life Sci.* 76, 1135-1150.
- 749 Li, Y., Wu, Y., Khan, I., Zhou, J., Lu, Y., Ye, J., Liu, J., Xie, X., Hu, C., Jiang, H., Fan, S.,  
750 Zhang, H., Zhang, Y., Jiang, X., Xu, B., Ma, H., Shi, Q., 2023. M1AP interacts with the  
751 mammalian ZZS complex and promotes male meiotic recombination. *EMBO Rep.* 24,  
752 e55778.

M1AP & meiotic recombination

---

- 753 Macaisne, N., Novatchkova, M., Peirera, L., Vezon, D., Jolivet, S., Froger, N., Chelysheva,  
754 L., Grelon, M., Mercier, R., 2008. SHOC1, an XPF Endonuclease-Related Protein, Is  
755 Essential for the Formation of Class I Meiotic Crossovers. *Curr. Biol.* 18, 1432–1437.
- 756 Nagirnaja, L., Lopes, A.M., Charng, W.L., Miller, B., Stakaitis, R., Golubickaite, I., Stendahl,  
757 A., Luan, T., Friedrich, C., Mahyari, E., Fadiel, E., Kasak, L., Vigh-Conrad, K., Oud,  
758 M.S., Xavier, M.J., Cheers, S.R., James, E.R., Guo, J., Jenkins, T.G., Riera-Escamilla,  
759 A., Barros, A., Carvalho, F., Fernandes, S., Gonçalves, J., Gurnett, C.A., Jørgensen, N.,  
760 Jezek, D., Jungheim, E.S., Kliesch, S., McLachlan, R.I., Omurtag, K.R., Pilatz, A.,  
761 Sandlow, J.I., Smith, J., Eisenberg, M.L., Hotaling, J.M., Jarvi, K.A., Punab, M., Rajpert-  
762 De Meyts, E., Carrell, D.T., Krausz, C., Laan, M., O'Bryan, M.K., Schlegel, P.N.,  
763 Tüttelmann, F., Veltman, J.A., Almstrup, K., Aston, K.I., Conrad, D.F., 2022. Diverse  
764 monogenic subforms of human spermatogenic failure. *Nat. Commun.* 13, 7953.
- 765 Nieschlag, E., Behre, H.M., Nieschlag, S., Kliesch, S., 2023. *Andrology*, 4th ed. Springer  
766 Berlin Heidelberg, Berlin, Heidelberg.
- 767 Pyatnitskaya, A., Borde, V., De Muyt, A., 2019. Crossing and zipping: molecular duties of the  
768 ZMM proteins in meiosis. *Chromosoma.* 128, 181-198.
- 769 Qi, Y., Wang, Y., Li, W., Zhuang, S., Li, S., Xu, K., Qin, Y., Guo, T., 2023. Pathogenic bi-  
770 allelic variants of meiotic ZMM complex gene SPO16 in premature ovarian insufficiency.  
771 *Clin. Genet.* 104, 486–490.
- 772 Rodrigo, L., Meseguer, M., Mateu, E., Mercader, A., Peinado, V., Bori, L., Campos-Galindo,  
773 I., Milán, M., García-Herrero, S., Simón, C., Rubio, C., 2019. Sperm chromosomal  
774 abnormalities and their contribution to human embryo aneuploidy. *Biol. Reprod.* 101,  
775 1091–1101.
- 776 Saraste, A., Pulkki, K., 2000. Morphologic and biochemical hallmarks of apoptosis.  
777 *Cardiovasc. Res.* 45, 528-537.



M1AP & meiotic recombination

---

- 778 Song, N., Liu, J., An, S., Nishino, T., Hishikawa, Y., Koji, T., 2011. Immunohistochemical  
779 analysis of histone H3 modifications in germ cells during mouse spermatogenesis. *Acta*  
780 *Histochem. Cytochem.* 44, 183–190.
- 781 Sun, F., Mikhaail-Philips, M., Oliver-Bonet, M., Ko, E., Rademaker, A., Turek, P., Martin,  
782 R.H., 2008. The relationship between meiotic recombination in human spermatocytes  
783 and aneuploidy in sperm. *Hum. Reprod.* 23, 1691–1697.
- 784 Sun, F., Trpkov, K., Rademaker, A., Ko, E., Martin, R.H., 2005. Variation in meiotic  
785 recombination frequencies among human males. *Hum. Genet.* 116, 172–178.
- 786 Sun, H., Treco, D., Schultes, N.P., Szostak, J.W., 1989. Double-strand breaks at an initiation  
787 site for meiotic gene conversion. *Nature* 338, 87–90.
- 788 Tu, C., Wang, Y., Nie, H., Meng, L., Wang, W., Li, Y., Li, D., Zhang, H., Lu, G., Lin, G., Tan,  
789 Y.Q., Du, J., 2020. An M1AP homozygous splice-site mutation associated with severe  
790 oligozoospermia in a consanguineous family. *Clin. Genet.* 97, 741–746.
- 791 Vander Borght, M., Wyns, C., 2018. Fertility and infertility: Definition and epidemiology. *Clin.*  
792 *Biochem.* 62, 2-10.
- 793 Wang, S., Zickler, D., Kleckner, N., Zhang, L., 2015. Meiotic crossover patterns: Obligatory  
794 crossover, interference and homeostasis in a single process. *Cell Cycle* 14, 305–314.
- 795 Weinbauer, G.F., Behr, R., Bergmann, M., Nieschlag, E., 1998. Testicular cAMP responsive  
796 element modulator (CREM) protein is expressed in round spermatids but is absent or  
797 reduced in men with round spermatid maturation arrest. *Mol. Hum. Reprod.* 4, 9–15.
- 798 World Health Organization, 2023. Infertility prevalence estimates, 1990-2021. Geneva.
- 799 Wyrwoll, M.J., Köckerling, N., Vockel, M., Dicke, A.K., Rotte, N., Pohl, E., Emich, J., Wöste,  
800 M., Ruckert, C., Wabschke, R., Seggewiss, J., Ledig, S., Tewes, A.C., Stratis, Y.,  
801 Cremers, J.F., Wistuba, J., Krallmann, C., Kliesch, S., Röpke, A., Stallmeyer, B.,

M1AP & meiotic recombination

---

- 802 Friedrich, C., Tüttelmann, F., 2023a. Genetic Architecture of Azoospermia—Time to  
803 Advance the Standard of Care. *Eur. Urol.* 83, 452–462.
- 804 Wyrwoll, M.J., Temel, Ş.G., Nagirnaja, L., Oud, M.S., Lopes, A.M., van der Heijden, G.W.,  
805 Heald, J.S., Rotte, N., Wistuba, J., Wöste, M., Ledig, S., Krenz, H., Smits, R.M.,  
806 Carvalho, F., Gonçalves, J., Fietz, D., Türkgenç, B., Ergören, M.C., Çetinkaya, M.,  
807 Başar, M., Kahraman, S., McEleny, K., Xavier, M.J., Turner, H., Pilatz, A., Röpke, A.,  
808 Dugas, M., Kliesch, S., Neuhaus, N., Aston, K.I., Conrad, D.F., Veltman, J.A., Friedrich,  
809 C., Tüttelmann, F., 2020. Bi-allelic Mutations in M1AP Are a Frequent Cause of Meiotic  
810 Arrest and Severely Impaired Spermatogenesis Leading to Male Infertility. *Am. J. Hum.*  
811 *Genet.* 107, 342–351.
- 812 Wyrwoll, M.J., van der Heijden, G.W., Krausz, C., Aston, K.I., Kliesch, S., McLachlan, R.,  
813 Ramos, L., Conrad, D.F., O'Bryan, M.K., Veltman, J.A., Tüttelmann, F., 2023b.  
814 Improved phenotypic classification of male infertility to promote discovery of genetic  
815 causes. *Nat. Rev. Urol.* 21, 91-101.
- 816 Xie, C., Wang, W., Tu, C., Meng, L., Lu, G., Lin, G., Lu, L.Y., Tan, Y.Q., 2022. Meiotic  
817 recombination: insights into its mechanisms and its role in human reproduction with a  
818 special focus on non-obstructive azoospermia. *Hum. Reprod. Update* 28, 763–797.
- 819 Xu, R., Ding, Y., Wang, Y., He, Y., Sun, Y., Lu, Y., Yao, N., 2021. Comparison of  
820 preimplantation genetic testing for aneuploidy versus intracytoplasmic sperm injection in  
821 severe male infertility. *Andrologia* 53, e14065.
- 822 Yang, F., Gell, K., Van Der Heijden, G.W., Eckardt, S., Leu, N.A., Page, D.C., Benavente, R.,  
823 Her, C., Höög, C., McLaughlin, K.J., Wang, P.J., 2008. Meiotic failure in male mice  
824 lacking an X-linked factor. *Genes Dev.* 22, 682–691.
- 825 Yang, F., Silber, S., Leu, N.A., Oates, R.D., Marszalek, J.D., Skaletsky, H., Brown, L.G.,  
826 Rozen, S., Page, D.C., Wang, P.J., 2015. TEX11 is mutated in infertile men with

M1AP & meiotic recombination

---

- 827 azoospermia and regulates genome-wide recombination rates in mouse. *EMBO Mol.*  
828 *Med.* 7, 1198–1210.
- 829 Yatsenko, A.N., Georgiadis, A.P., Röpke, A., Berman, A.J., Jaffe, T., Olszewska, M.,  
830 Westernströer, B., Sanfilippo, J., Kurpisz, M., Rajkovic, A., Yatsenko, S.A., Kliesch, S.,  
831 Schlatt, S., Tüttelmann, F., 2015. X-Linked TEX11 Mutations, Meiotic Arrest, and  
832 Azoospermia in Infertile Men. *N. Engl. J. Med.* 372, 2097–2107.
- 833 Yu, X.C., Li, M.J., Cai, F.F., Yang, S.J., Liu, H. Bin, Zhang, H.B., 2021. A new TEX11  
834 mutation causes azoospermia and testicular meiotic arrest. *Asian J. Androl.* 23, 510–  
835 515.
- 836 Yuan, L., Liu, J.G., Zhao, J., Brundell, E., Daneholt, B., Höög, C., 2000. The murine SCP3  
837 gene is required for synaptonemal complex assembly, chromosome synapsis, and male  
838 fertility. *Mol. Cell* 5, 73–83.
- 839 Zhang, Q., Ji, S.Y., Busayavalasa, K., Yu, C., 2019. SPO16 binds SHOC1 to promote  
840 homologous recombination and crossing-over in meiotic prophase I. *Sci. Adv.* 5,  
841 eaau9780.
- 842 Zhang, Q., Shao, J., Fan, H.Y., Yu, C., 2018. Evolutionarily-conserved MZIP2 is essential for  
843 crossover formation in mammalian meiosis. *Commun. Biol.* 1, 147.
- 844 Zickler, D., Kleckner, N., 2015. Recombination, pairing, and synapsis of homologs during  
845 meiosis. *Cold Spring Harb. Perspect. Biol.* 7, 1–28.
- 846

847 **Table 1. Genetic and testicular characteristics of infertile men with loss-of-function variants in *M1AP* or the *ZZS* genes**

| Case                                                       | Genetic variant                                          | Semen analysis   | Arrest type – most advanced germ cell type | TESE/MAR outcome          | Reference                                    |
|------------------------------------------------------------|----------------------------------------------------------|------------------|--------------------------------------------|---------------------------|----------------------------------------------|
| <b>M1AP – autosomal-recessive inheritance, NM_138804.4</b> |                                                          |                  |                                            |                           |                                              |
| M330                                                       |                                                          | azoospermia      | metaphase I arrest – elongated spermatids  | negative                  | Wyrwoll et al., 2020                         |
| M864                                                       |                                                          | azoospermia      | metaphase I arrest – round spermatids      | negative                  | Wyrwoll et al., 2020                         |
| M1792                                                      |                                                          | azoospermia      | NA                                         | negative                  | Wyrwoll et al., 2020, Nagirnaja et al., 2022 |
| M2062                                                      | c.[676dup];[676dup]<br>p.[Trp226Leufs*4];[Trp226Leufs*4] | cryptozoospermia | metaphase I arrest – elongated spermatids  | positive, ICSI failed     | Wyrwoll et al., 2020, Wyrwoll et al., 2023   |
| M2525                                                      |                                                          | azoospermia      | metaphase I arrest – round spermatids      | negative                  |                                              |
| M2746                                                      |                                                          | cryptozoospermia | metaphase I arrest – elongated spermatids  | positive, ICSI successful |                                              |
| M2747                                                      |                                                          | cryptozoospermia | metaphase I arrest – elongated spermatids  | negative                  |                                              |
| M3402                                                      |                                                          | azoospermia      | metaphase I arrest – elongated spermatids  | positive, ICSI failed     |                                              |

M1AP & meiotic recombination

|       |                                                                                  |             |                                           |                       |  |
|-------|----------------------------------------------------------------------------------|-------------|-------------------------------------------|-----------------------|--|
| M3511 |                                                                                  | azoospermia | metaphase I arrest – elongated spermatids | positive, ICSI failed |  |
| M3609 | c.[1073_1074+10del];[1073_1074+10del]<br>p.[(Leu358Glnfs*58)];[(Leu358Glnfs*58)] | azoospermia | metaphase I arrest – round spermatids     | negative              |  |

**SHOC1 – autosomal-recessive inheritance, NM\_173521.5**

|       |                                                                                  |             |                                   |          |                        |
|-------|----------------------------------------------------------------------------------|-------------|-----------------------------------|----------|------------------------|
| M2012 | c.[1085_1086del];[1085_1086del]<br>p.[(Glu362Valfs*25)];[(Glu362Valfs*25)]       | azoospermia | NA                                | NA       | Krausz et al., 2020    |
| G-377 | c.[1085_1086del];[1085_1086del]<br>p.[(Glu362Valfs*25)];[(Glu362Valfs*25)]       | azoospermia | meiotic arrest – spermatocytes    | negative | Nagirnaja et al., 2022 |
| M2046 | c.[1351del;1347T>A];[945_948del]<br>p.[(Ser451Leufs*23;Cys449*);[Glu315Aspfs*6)] | azoospermia | meiotic arrest – spermatocytes    | negative | Krausz et al., 2020    |
| M3260 | c.[1939+2T>C];[1939+2T>C]<br>p.?                                                 | azoospermia | meiotic arrest – round spermatids | negative |                        |

**TEX11– X-linked inheritance, NM\_001003811.2**

|      |                                   |             |                                |          |                       |
|------|-----------------------------------|-------------|--------------------------------|----------|-----------------------|
| M205 | c.[1837+1G>C];[0]<br>p.?          | azoospermia | meiotic arrest – spermatocytes | negative | Yatsenko et al., 2015 |
| M246 | c.[22del];[0]<br>p.(Ser8Profs*31) | azoospermia | meiotic arrest – spermatocytes | negative |                       |
| M281 | c.[792+1G>A];[0]<br>p.?           | azoospermia | meiotic arrest – spermatocytes | negative | Yatsenko et al., 2015 |

M1AP & meiotic recombination

|       |                                               |             |                                   |          |                      |
|-------|-----------------------------------------------|-------------|-----------------------------------|----------|----------------------|
| M1390 | c.[(159+1_160-1)_(692+1_693-1)del];[0]<br>p.? | azoospermia | meiotic arrest –<br>spermatocytes | negative | Wyrwoll et al., 2023 |
| M2739 | c.[1052dup];[0]<br>p.(Ser352Valfs*14)         | azoospermia | meiotic arrest –<br>NA            | negative |                      |
| M2820 | c.[(-157_-99+1)_(738-1_792+1)del];[0]<br>p.?  | azoospermia | meiotic arrest –<br>NA            | negative |                      |
| M2942 | c.[1245G>A];[0]<br>p.(Trp415*)                | azoospermia | NA                                | NA       |                      |
| M3152 | c.[(652-1_737+1)_(738-1_792+1)];[0]<br>p.?    | azoospermia | NA                                | NA       |                      |
| M3409 | c.[731G>A];[0]<br>p.(Trp244*)                 | azoospermia | meiotic arrest –<br>spermatocytes | negative |                      |

**SPO16 – autosomal-recessive inheritance, NM\_001012425.2**

|       |                                                               |             |                                   |          |  |
|-------|---------------------------------------------------------------|-------------|-----------------------------------|----------|--|
| M3863 | c.[266del];[266del]<br>p.[(Leu89Trpfs*18)];[(Leu89Trpfs*18)]; | azoospermia | meiotic arrest –<br>spermatocytes | negative |  |
|-------|---------------------------------------------------------------|-------------|-----------------------------------|----------|--|

abbreviations: fs = frameshift, \* = premature stop codon, NA = not available, TESE = testicular sperm extraction, MAR = medically assisted reproduction.

M1AP & meiotic recombination

848 **Figures**

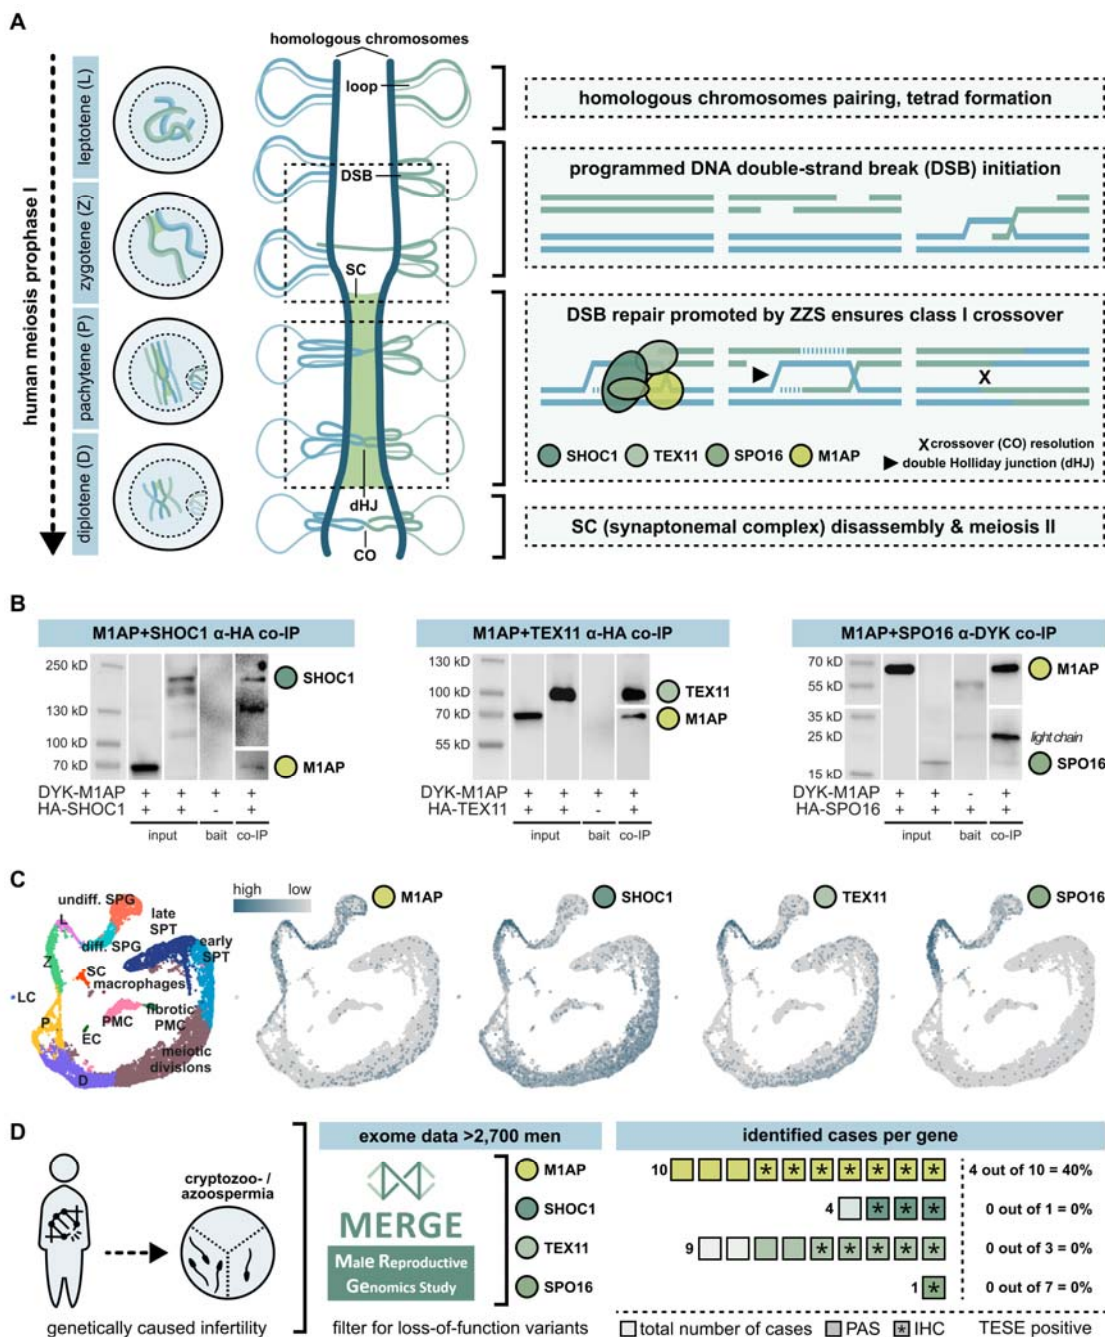

849

850 **Figure 1. Human meiotic recombination in men depends on ZYS function – and M1AP interacts with all**  
 851 **three complex components.** A. Illustration of human prophase I where recombination takes place. In leptotene  
 852 (L), homologous chromosomes duplicate, condensate, and align. DNA double-strand breaks (DSBs) are initiated.  
 853 In zygotene (Z), the completion of synapsis is supported by a ladder-like structure – the synaptonemal complex  
 854 (SC). DSB repair in pachytene (P) results in at least one crossover per chromosome pair (= obligatory crossover  
 855 principle) and highly depends on SHOC1, TEX11, and SPO16 (= ZYS complex) activity. An integration of M1AP in  
 856 this process was shown in mice (Li et al., 2023). B. Co-immunoprecipitation (IP) proved the interaction of human  
 857 M1AP (detected by N-terminal DYK-tag) with each of the ZYS complex proteins (detected by C-terminal HA-tag).  
 858 Input and bait proteins served as positive and negative controls. C. Uniform manifold approximation and  
 859 projection (UMAP) plot of obstructive azoospermic controls (N=3) adapted from Di Persio et al., 2021. Through  
 860 mRNA expression profiling, individual stages of human spermatogenesis were clustered and visualised.  
 861 Expression data of human *M1AP*, *SHOC1*, *TEX11*, and *SPO16* mRNA was compiled by querying the dataset. D.  
 862 For each gene, variants leading to dysfunctional proteins were searched for in the MERGE study dataset to

## M1AP & meiotic recombination

---

863 associate a deficient genotype with a distinct phenotype. Overall, ten men with LoF variants in *M1AP*, four men  
864 with LoF variants in *SHOC1* (N=3 from MERGE and N=1 from GEMINI), nine men with LoF variants in *TEX11*,  
865 and one man with a LoF variant in *SPO16* were selected. If possible, material aiming for testicular sperm  
866 extraction (TESE) was used for subsequent analyses including periodic acid-Schiff (PAS) or haematoxylin and  
867 eosin (H&E) staining (both highlighted in bolder colour), immunohistochemical staining (IHC = \*), and  
868 spermatocyte spreads (one sample per gene of interest). A positive TESE result was only seen in men with LoF  
869 variants in *M1AP* (N=4).

870



M1AP & meiotic recombination

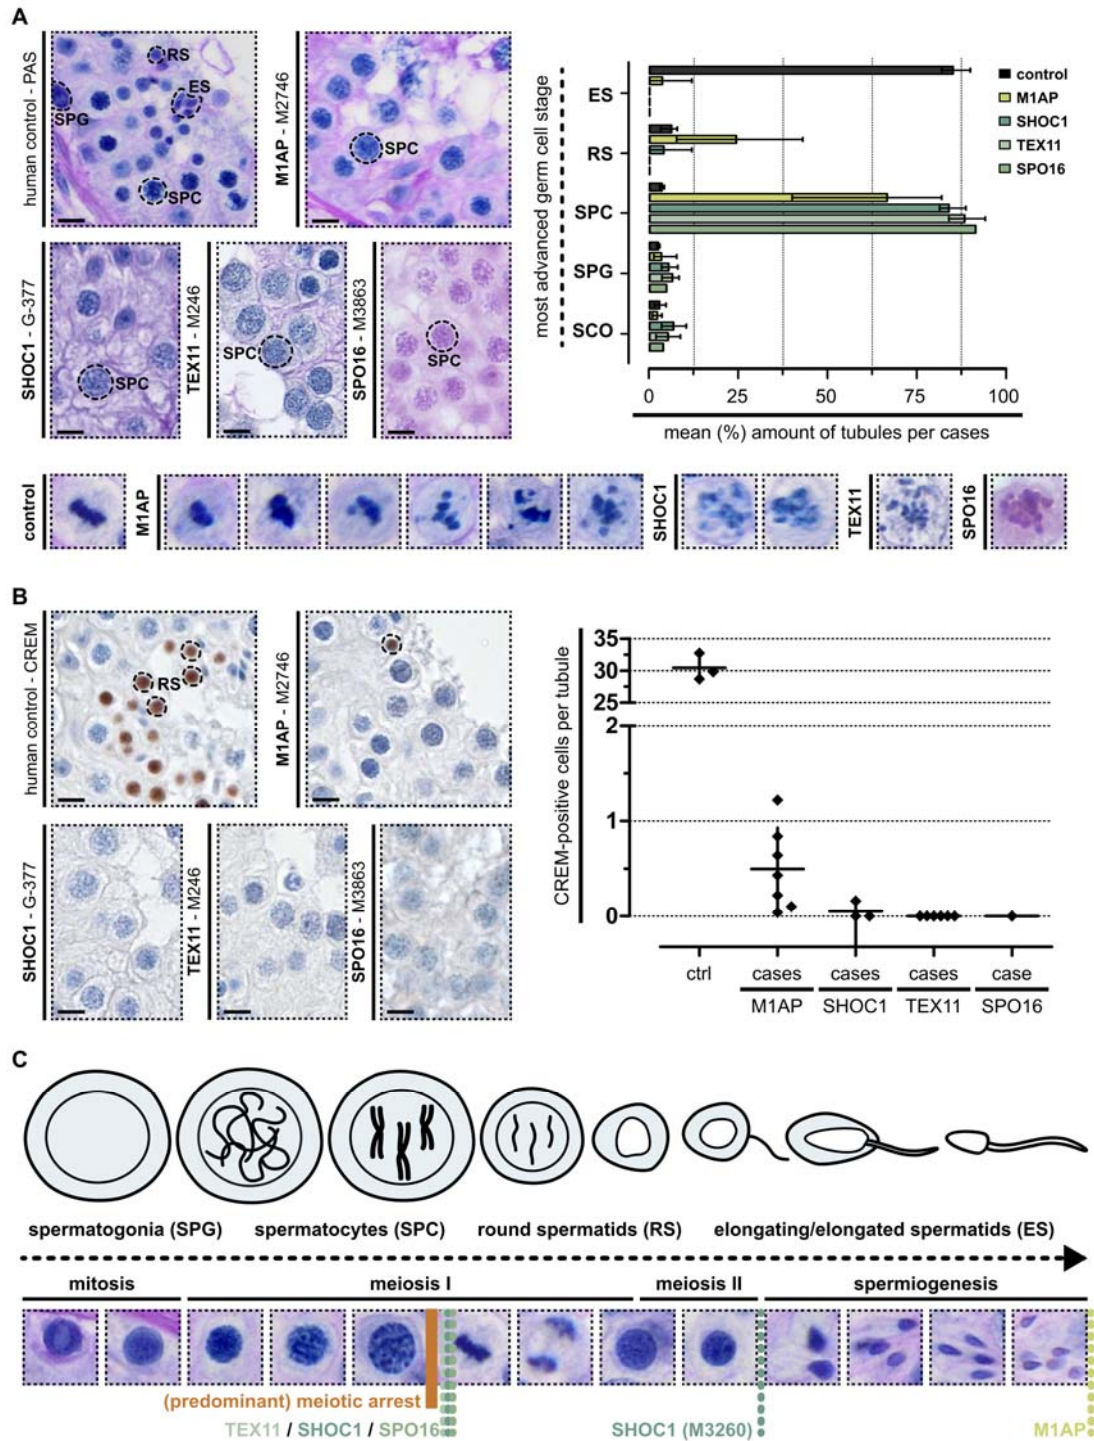

871

872

873

874

875

876

877

878

879

880

881

882

**Figure 2. Testicular phenotyping of men with loss-of-function variants in *M1AP*, *SHOC1*, *TEX11*, and *SPO16*.** A. PAS staining of testicular tissue with full spermatogenesis and infertile men with LoF variants in genes encoding the ZZS proteins and M1AP. One representative case per gene is depicted (*M1AP*: M2746, *SHOC1*: G-377, *TEX11*: M246, *SPO16*: M3863). For all biopsies, the most advanced germ cell type per tubule was assessed and is shown in the representative image and the bar graph. In addition, intact (control, M1AP) and aberrant (M1AP, SHOC1, TEX11, SPO16) metaphase cells were observed (detail view). B. Haploid germ cells were analysed by CREM localisation. Only men with LoF variants in *M1AP* had CREM-positive round spermatids. Compared to the controls, the total amount of these cells was significantly reduced. C. Schematic illustration and corresponding PAS staining of human spermatogenesis. Coloured dotted lines represent the identified gene-specific germ cell arrest. SPG: spermatogonia, SPC: spermatocytes, RS: round spermatids, ES: elongated spermatids. The scale bar represents 10  $\mu$ m.

M1AP & meiotic recombination

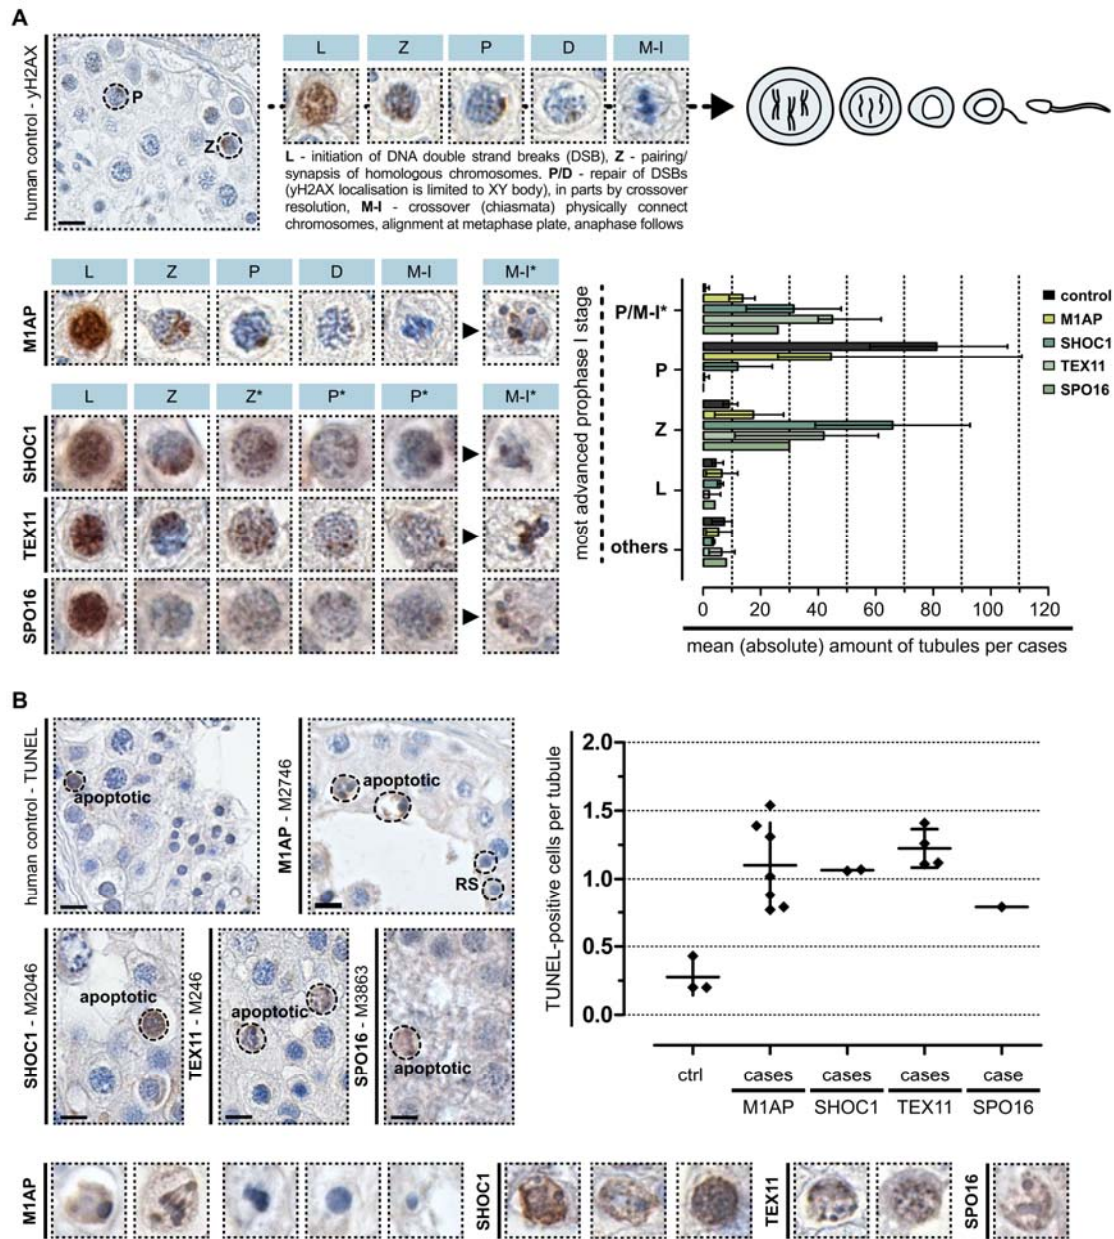

M1AP & meiotic recombination

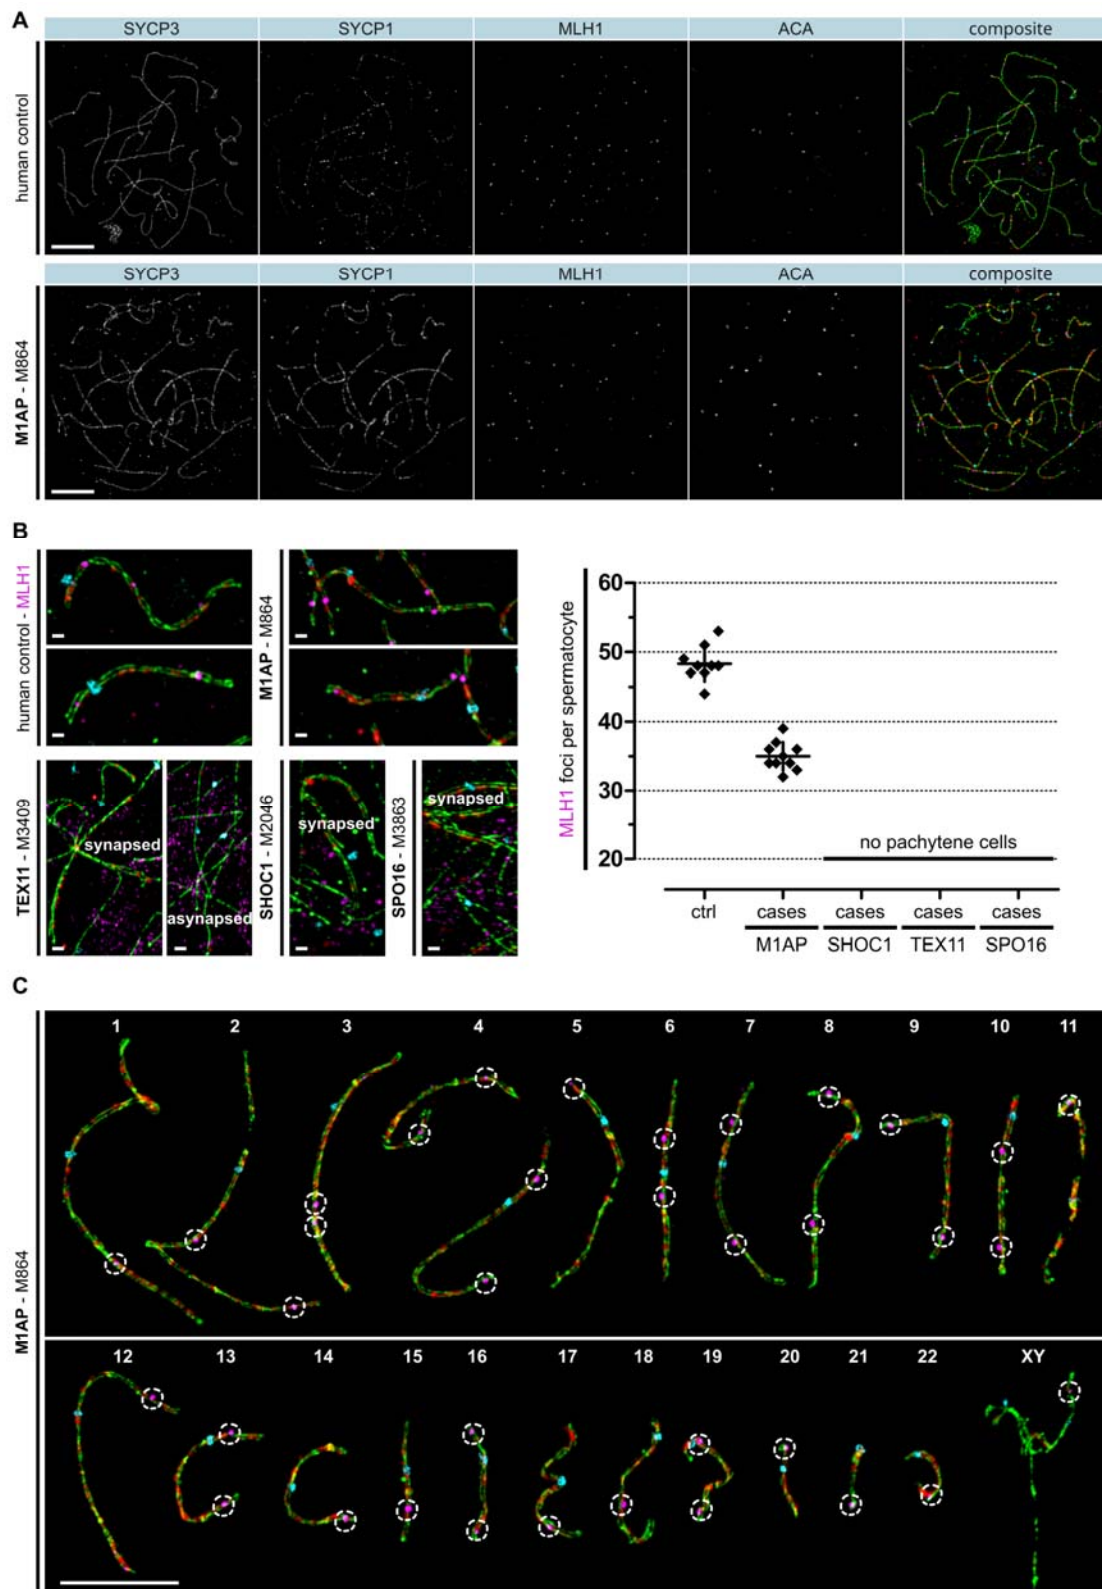

892

893

894

895

896

897

898

**Figure 4. A man with loss-of-function variant in *M1AP* showed reduced MLH1 foci.** A. Human spermatocyte spreads were stained for synaptonemal complex formation (= SYCP3, green + SYCP1, red), centromeric regions (= ACA, cyan), and designated crossover sites (= MLH1, magenta). A control and M864, deficient for *M1AP*, were compared. B. MLH1 localisation was seen on synapsed chromosome axes of pachytene spermatocytes in the control and M864. The total number of MLH1 foci per spermatocyte was reduced in M864. In contrast, men deficient for *SHOC1* (M2046), *TEX11* (M3409), or *SPO16* (M8363) completely lacked pachytene cells. Instead,

## M1AP & meiotic recombination

---

899 spermatocytes showed increased asynapsed chromosomes where SYCP1 localisation was lacking. No MLH1  
900 was seen because cells arrested in a zygotene-like stage. C. Super resolution structured illumination microscopy  
901 (SR-SIM) of one spreaded spermatocyte. Homologous chromosomes were digitally separated to mark the MLH1  
902 foci (dotted circles), which represent the sites of crossover. In this spermatocyte, each pair of homologues has at  
903 least one MLH1 focus and, thus, the *obligatory crossover* principle is met. The scale bars represent 10  $\mu\text{m}$  and  
904 1  $\mu\text{m}$  for magnification.

## M1AP & meiotic recombination

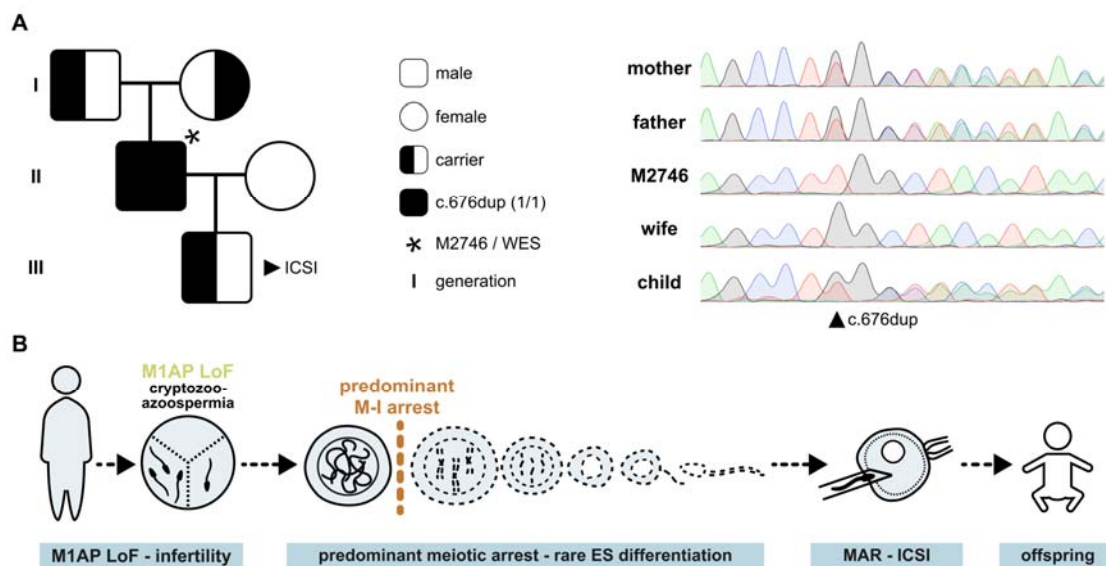

905

906

907

908

909

910

911

**Figure 5. M1AP-associated infertility can be overcome by medically assisted reproduction (MAR).** A. One man (M2746) with a loss-of-function variant in *M1AP* was diagnosed with cryptozoospermia and predominant meiotic arrest. Three cycles of intracytoplasmic sperm injection (ICSI) with ejaculate-derived spermatozoa resulted in the birth of a healthy boy. Segregation analysis showed the autosomal-recessive inheritance pattern of the frameshift variant c.676dup. B. Illustration of how predominant meiotic arrest caused by M1AP-associated infertility still enables fatherhood.

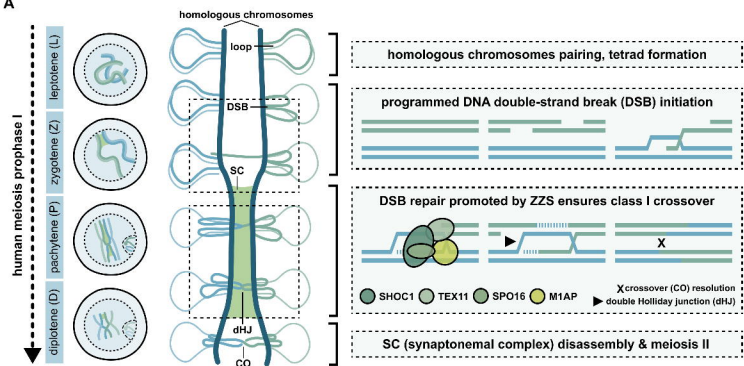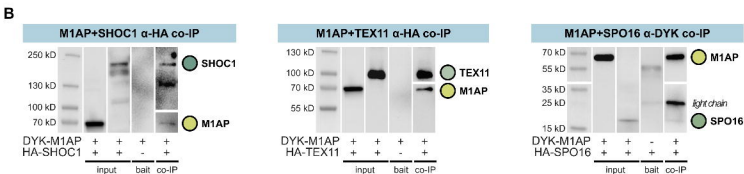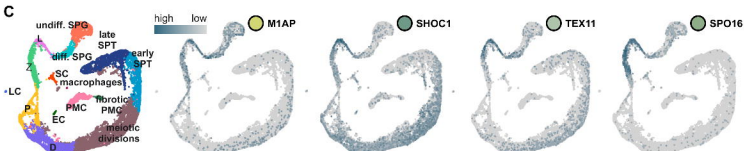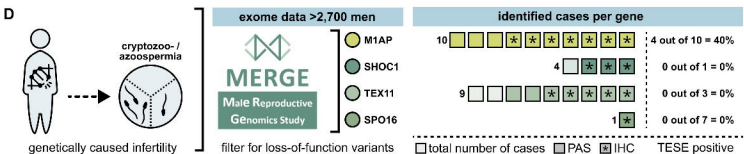

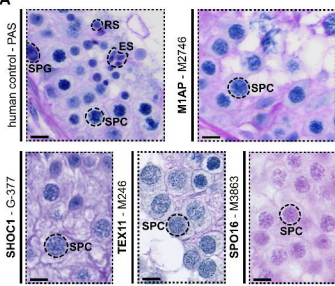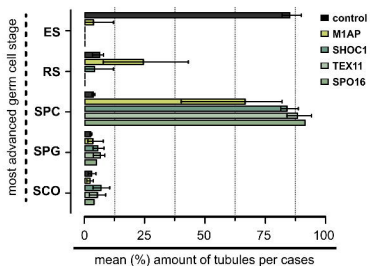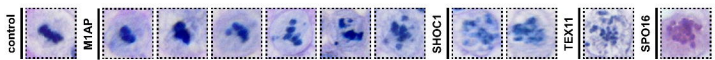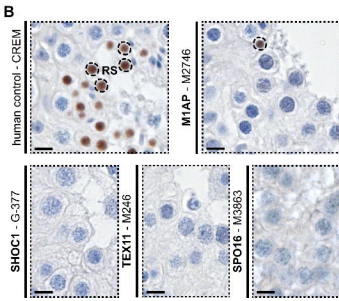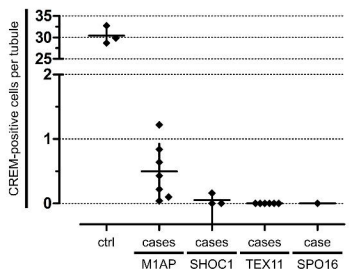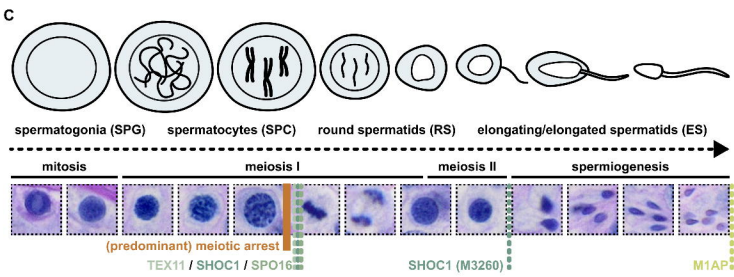

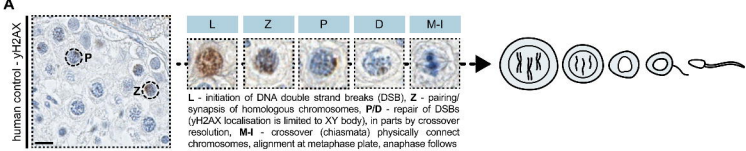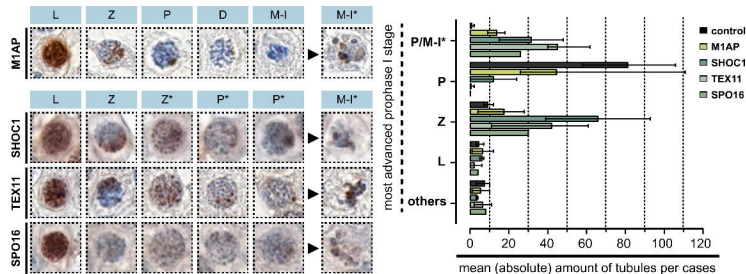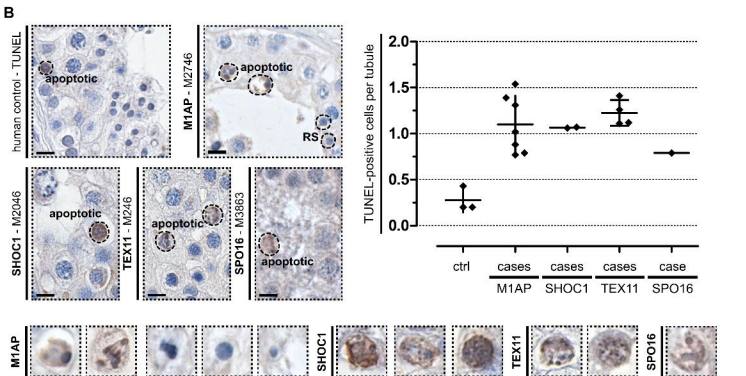



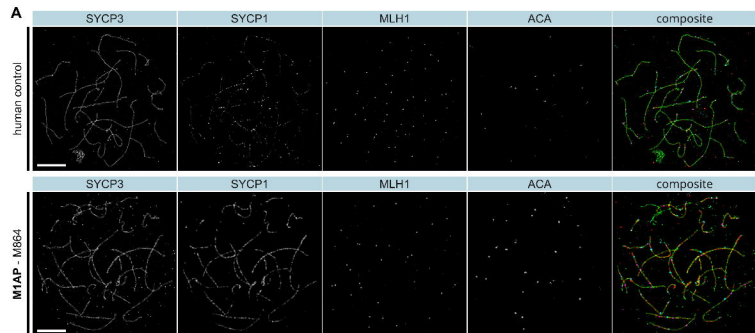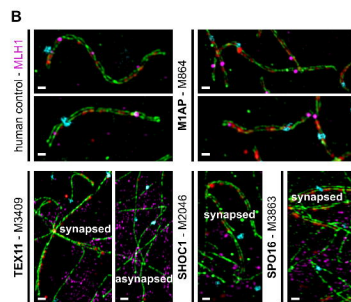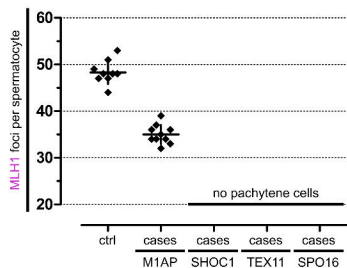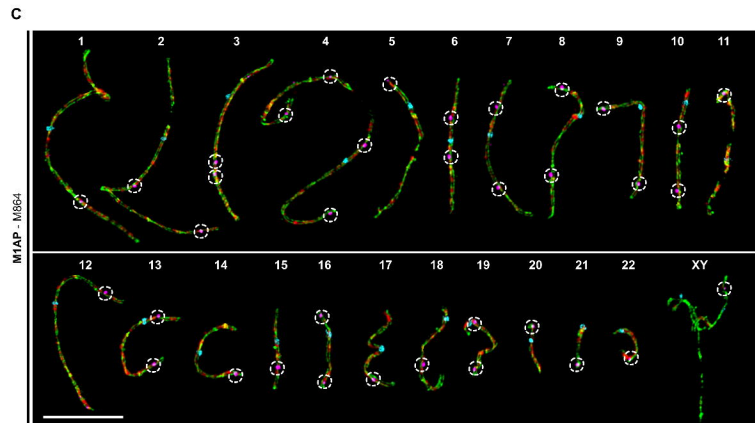

**A**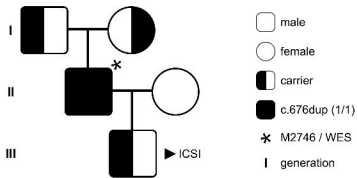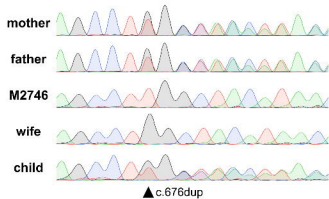**B**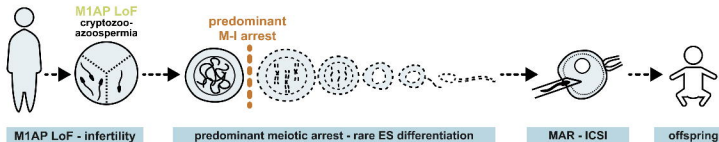

Source: https://medrxiv.org/content/10.1101/2024.03.20.24304490v1.full.pdf
